# Supplementary material
Source: PubMed Central journal article supplement (PMC4784834)
Supplement: amih027931.ww1_default.pdf [file amih027931.ww1_default.pdf]

## APPENDIX A: SEARCH STRATEGY

Searches were performed as part of a full comparative effectiveness review of benefits and harms of second-generation antidepressants, psychotherapies, complementary and alternative medicine treatments, and exercise interventions for patients with major depressive disorders.<sup>26</sup> Therefore, the table below has search terms for interventions that are irrelevant for this specific paper.

### MEDLINE via PubMed: 02/05/2014

| Search | Query                                                                                                                                                                                                                                              | Items found |
|--------|----------------------------------------------------------------------------------------------------------------------------------------------------------------------------------------------------------------------------------------------------|-------------|
| #1     | Search ("Bupropion"[Mesh] OR "Bupropion"[tiab] OR 34911-55-2[rn])                                                                                                                                                                                  | 3570        |
| #2     | Search ("Citalopram"[Mesh] OR "Citalopram"[tiab] OR 59729-33-8[rn])                                                                                                                                                                                | 5061        |
| #3     | Search ("Escitalopram"[tiab] OR 128196-01-0[rn])                                                                                                                                                                                                   | 4031        |
| #4     | Search ("O-desmethylvenlafaxine" [Supplementary Concept] OR Desvenlafaxine[tiab] OR 93413-62-8[rn])                                                                                                                                                | 234         |
| #5     | Search ("Fluoxetine"[Mesh] OR "Fluoxetine"[tiab] OR 54910-89-3[rn])                                                                                                                                                                                | 10911       |
| #6     | Search ("Fluvoxamine"[Mesh] OR "Fluvoxamine"[tiab] OR 54739-18-3[rn])                                                                                                                                                                              | 2551        |
| #7     | Search ("milnacipran"[Supplementary Concept] OR "Levomilnacipran"[tiab] OR 96847-54-0[rn])                                                                                                                                                         | 346         |
| #8     | Search ("mirtazapine"[Supplementary Concept] OR "mirtazapine"[tiab] OR 85650-52-8[rn])                                                                                                                                                             | 1574        |
| #9     | Search ("nefazodone"[Supplementary Concept] OR "nefazodone"[tiab] OR 82752-99-6[rn])                                                                                                                                                               | 706         |
| #10    | Search ("Paroxetine"[Mesh] OR "Paroxetine"[tiab] OR 61869-08-7[rn])                                                                                                                                                                                | 5220        |
| #11    | Search ("Sertraline"[Mesh] OR "Sertraline"[tiab] OR 79617-96-2[rn])                                                                                                                                                                                | 3732        |
| #12    | Search ("Trazodone"[Mesh] OR "Trazodone"[tiab] OR 19794-93-5[rn])                                                                                                                                                                                  | 1685        |
| #13    | Search ("venlafaxine"[Supplementary Concept] OR "venlafaxine"[tiab] OR 93413-69-5[rn])                                                                                                                                                             | 3124        |
| #14    | Search ("vilazodone"[Supplementary Concept] OR "vilazodone"[tiab] OR 163521-12-8[rn])                                                                                                                                                              | 65          |
| #15    | Search ("vortioxetine"[Supplementary Concept] OR "vortioxetine"[tiab] OR 508233-74-7[rn])                                                                                                                                                          | 50          |
| #16    | Search ("Antidepressive Agents, Second-Generation"[Mesh] OR "Antidepressive Agents, Second-Generation"[Pharmacological Action])                                                                                                                    | 57579       |
| #17    | Search (#1 OR #2 OR #3 OR #4 OR #5 OR #6 OR #7 OR #8 OR #9 OR #10 OR #11 OR #12 OR #13 OR #14 OR #15 OR #16)                                                                                                                                       | 67046       |
| #18    | Search ("Psychotherapy"[Mesh] OR psychotherap*[tiab])                                                                                                                                                                                              | 156412      |
| #19    | Search (Acceptance and Commitment Therap*[tiab] OR Cognitive Therap*[tiab] OR Cognitive behavioral Therap*[tiab] OR interpersonal therap*[tiab] OR psychodynamic therap*[tiab] OR behavioral therap*[tiab])                                        | 8028        |
| #20    | Search (#18 OR #19)                                                                                                                                                                                                                                | 158665      |
| #21    | Search ("Hypericum"[Mesh] OR "Hypericum"[tiab] OR "St. Johns Wort"[tiab] OR "Saint Johns Wort"[tiab] OR "St. John's Wort"[tiab] OR "Saint John's Wort"[tiab] OR L1160[tiab] OR L1160[tiab] OR WS5572[tiab] OR WS5573[tiab] OR LoHyp-57[tiab])      | 2591        |
| #22    | Search ("s adenosyl l methionine"[tiab] OR "s adenosylmethionine"[tiab] OR "S-Adenosylmethionine"[Mesh])                                                                                                                                           | 8814        |
| #23    | Search ("Fatty Acids, Omega-3"[Mesh] OR (omega 3[tiab] AND fatty acid*[tiab]) OR fish oil[tiab] OR flax seed[tiab] OR borage seed[tiab] OR Borago[tiab] OR evening primrose[tiab] OR Oenothera[tiab] OR eicosapentaenoic acid[tiab] OR PUFA[tiab]) | 27732       |
| #24    | Search ("Acupuncture"[Mesh] OR "Acupuncture Therapy"[Mesh] OR Acupuncture[tiab] OR Electroacupuncture[tiab])                                                                                                                                       | 20337       |
| #25    | Search ("Yoga"[Mesh] OR yoga[tiab])                                                                                                                                                                                                                | 2387        |
| #26    | Search ("Meditation"[Mesh] OR meditation[tiab] OR mindfulness[tiab])                                                                                                                                                                               | 4174        |
| #27    | Search ("Exercise"[Mesh] OR physical activit*[tiab] OR "physical exercise"[tiab])                                                                                                                                                                  | 159734      |
| #28    | Search (#22 OR #23 OR #24 OR #25 OR #26 OR #27)                                                                                                                                                                                                    | 221143      |
| #29    | Search ("Depressive Disorder, Major"[MeSH] OR "major depressive disorder"[tiab] OR                                                                                                                                                                 | 35489       |

| Search | Query                                                                                                                                                                                                                                                                                                                                                                                                                                                                                                                                   | Items found |
|--------|-----------------------------------------------------------------------------------------------------------------------------------------------------------------------------------------------------------------------------------------------------------------------------------------------------------------------------------------------------------------------------------------------------------------------------------------------------------------------------------------------------------------------------------------|-------------|
|        | "major depression"[tiab])                                                                                                                                                                                                                                                                                                                                                                                                                                                                                                               |             |
| #30    | Search (#29 AND (#28 OR #20 OR #17))                                                                                                                                                                                                                                                                                                                                                                                                                                                                                                    | 7950        |
| #31    | Search (systematic*[tiab] AND (bibliographic*[tiab] OR literature[tiab] OR review[tiab] OR reviewed[tiab] OR reviews[tiab])) OR (comprehensive*[tiab] AND (bibliographic*[tiab] OR literature[tiab])) OR "research synthesis"[tiab] OR "research integration"[tiab] OR meta-analy*[tiab] OR metaanaly*[tiab] OR "meta-analysis as topic"[mh] OR "Meta-Analysis"[pt] OR ("review"[tiab] AND ("rationale"[tiab] OR "evidence"[tiab]) AND review[pt]) OR "Systematic Review"[tiab] OR ("Review"[Publication Type] AND "systematic"[tiab])) | 241160      |
| #32    | Search ("Randomized Controlled Trial"[Publication Type] OR "Randomized Controlled Trials as Topic"[MeSH] OR "Randomized Controlled Trial"[tiab] OR "Single-Blind Method"[MeSH] OR "Double-Blind Method"[MeSH] OR "Random Allocation"[MeSH])                                                                                                                                                                                                                                                                                             | 542163      |
| #33    | Search (("cohort studies"[MeSH] OR cohort stud*[tiab] OR cohort analy*[tiab] OR "Case-Control Studies"[Mesh] OR case control stud*[tiab] OR observational stud*[tiab] OR "observational study"[pt] OR ((longitudinal[tiab] OR retrospective[tiab] OR prospective[tiab]) AND (study[tiab] OR trial[tiab]))) AND ("Comparative Study"[pt] OR comparison[tiab] OR comparative[tiab]))                                                                                                                                                      | 349594      |
| #34    | Search ("Controlled Clinical Trial"[pt] OR "Controlled Clinical Trials as Topic"[Mesh] OR controlled clinical trial*[tiab] OR controlled trial*[tiab] OR controlled stud*[tiab])                                                                                                                                                                                                                                                                                                                                                        | 319105      |
| #35    | Search (#30 AND (#31 OR #32 OR #33 OR #34))                                                                                                                                                                                                                                                                                                                                                                                                                                                                                             | 3642        |
| #36    | Search ("Animals"[Mesh] NOT "Humans"[Mesh])                                                                                                                                                                                                                                                                                                                                                                                                                                                                                             | 3882887     |
| #37    | Search (#35 NOT #36)                                                                                                                                                                                                                                                                                                                                                                                                                                                                                                                    | 3635        |
| #38    | Search ("Infant"[Mesh] OR "Child"[Mesh] OR "Adolescent"[Mesh]) NOT "Adult"[Mesh]                                                                                                                                                                                                                                                                                                                                                                                                                                                        | 1490657     |
| #39    | Search (#37 NOT #38)                                                                                                                                                                                                                                                                                                                                                                                                                                                                                                                    | 3398        |
| #40    | Search #39 AND 1990:2014[dp] AND (english[la] OR german[la] OR italian[la])                                                                                                                                                                                                                                                                                                                                                                                                                                                             | 3231        |

#### Addendum duloxetine 07/05/2014

| Search | Query                                                                                                                                                                                                                                                                                                                                                                                                                                                                                                                                    | Items found |
|--------|------------------------------------------------------------------------------------------------------------------------------------------------------------------------------------------------------------------------------------------------------------------------------------------------------------------------------------------------------------------------------------------------------------------------------------------------------------------------------------------------------------------------------------------|-------------|
| #1     | Search ("duloxetine" [Supplementary Concept] OR duloxetine[tiab])                                                                                                                                                                                                                                                                                                                                                                                                                                                                        | 1677        |
| #2     | Search ("Depressive Disorder, Major"[MeSH] OR "major depressive disorder"[tiab] OR "major depression"[tiab])                                                                                                                                                                                                                                                                                                                                                                                                                             | 35518       |
| #3     | Search (#1 AND #2)                                                                                                                                                                                                                                                                                                                                                                                                                                                                                                                       | 430         |
| #4     | Search ((systematic*[tiab] AND (bibliographic*[tiab] OR literature[tiab] OR review[tiab] OR reviewed[tiab] OR reviews[tiab])) OR (comprehensive*[tiab] AND (bibliographic*[tiab] OR literature[tiab])) OR "research synthesis"[tiab] OR "research integration"[tiab] OR meta-analy*[tiab] OR metaanaly*[tiab] OR "meta-analysis as topic"[mh] OR "Meta-Analysis"[pt] OR ("review"[tiab] AND ("rationale"[tiab] OR "evidence"[tiab]) AND review[pt]) OR "Systematic Review"[tiab] OR ("Review"[Publication Type] AND "systematic"[tiab])) | 241577      |
| #5     | Search (("Randomized Controlled Trial"[Publication Type] OR "Randomized Controlled Trials as Topic"[MeSH] OR "Randomized Controlled Trial"[tiab] OR "Single-Blind Method"[MeSH] OR "Double-Blind Method"[MeSH] OR "Random Allocation"[MeSH]))                                                                                                                                                                                                                                                                                            | 542686      |
| #6     | Search (((("cohort studies"[MeSH] OR cohort stud*[tiab] OR cohort analy*[tiab] OR "Case-Control Studies"[Mesh] OR case control stud*[tiab] OR observational stud*[tiab] OR "observational study"[pt] OR ((longitudinal[tiab] OR retrospective[tiab] OR prospective[tiab]) AND (study[tiab] OR trial[tiab]))) AND ("Comparative Study"[pt] OR comparison[tiab] OR comparative[tiab])))                                                                                                                                                    | 349872      |
| #7     | Search (("Controlled Clinical Trial"[pt] OR "Controlled Clinical Trials as Topic"[Mesh] OR controlled clinical trial*[tiab] OR controlled trial*[tiab] OR controlled stud*[tiab]))                                                                                                                                                                                                                                                                                                                                                       | 319351      |
| #8     | Search (#3 AND (#7 OR #6 OR #5 OR #4))                                                                                                                                                                                                                                                                                                                                                                                                                                                                                                   | 234         |
| #9     | Search (("Animals"[Mesh] NOT "Humans"[Mesh]))                                                                                                                                                                                                                                                                                                                                                                                                                                                                                            | 3884483     |
| #10    | Search (#8 NOT #9)                                                                                                                                                                                                                                                                                                                                                                                                                                                                                                                       | 234         |
| #11    | Search (("Infant"[Mesh] OR "Child"[Mesh] OR "Adolescent"[Mesh]) NOT "Adult"[Mesh])                                                                                                                                                                                                                                                                                                                                                                                                                                                       | 1491426     |
| #12    | Search (#10 NOT #11)                                                                                                                                                                                                                                                                                                                                                                                                                                                                                                                     | 234         |
| #13    | Search (#12 AND 1990:2014[dp] AND (english[la] OR german[la] OR italian[la]))                                                                                                                                                                                                                                                                                                                                                                                                                                                            | 229         |



## Cochrane Library 02/05/2014

| ID  | Search                                                                                                                                                                                                                                                                                                                                                                       | Hits   |
|-----|------------------------------------------------------------------------------------------------------------------------------------------------------------------------------------------------------------------------------------------------------------------------------------------------------------------------------------------------------------------------------|--------|
| #1  | [mh Bupropion] or "Bupropion":ti,ab                                                                                                                                                                                                                                                                                                                                          | 934    |
| #2  | [mh Citalopram] or "Citalopram":ti,ab                                                                                                                                                                                                                                                                                                                                        | 1196   |
| #3  | Escitalopram:ti,ab                                                                                                                                                                                                                                                                                                                                                           | 588    |
| #4  | Desvenlafaxine:ti,ab                                                                                                                                                                                                                                                                                                                                                         | 71     |
| #5  | [mh Fluoxetine] or "Fluoxetine":ti,ab                                                                                                                                                                                                                                                                                                                                        | 2364   |
| #6  | [mh Fluvoxamine] or "Fluvoxamine":ti,ab                                                                                                                                                                                                                                                                                                                                      | 687    |
| #7  | Levomilnacipran:ti,ab                                                                                                                                                                                                                                                                                                                                                        | 12     |
| #8  | mirtazapine:ti,ab                                                                                                                                                                                                                                                                                                                                                            | 439    |
| #9  | nefazodone:ti,ab                                                                                                                                                                                                                                                                                                                                                             | 194    |
| #10 | [mh Paroxetine] or "Paroxetine":ti,ab                                                                                                                                                                                                                                                                                                                                        | 1770   |
| #11 | [mh Sertraline] or "Sertraline":ti,ab                                                                                                                                                                                                                                                                                                                                        | 1350   |
| #12 | [mh Trazodone] or "Trazodone":ti,ab                                                                                                                                                                                                                                                                                                                                          | 335    |
| #13 | venlafaxine:ti,ab                                                                                                                                                                                                                                                                                                                                                            | 989    |
| #14 | vilazodone:ti,ab                                                                                                                                                                                                                                                                                                                                                             | 19     |
| #15 | vortioxetine:ti,ab                                                                                                                                                                                                                                                                                                                                                           | 13     |
| #16 | [mh "Antidepressive Agents, Second-Generation"]                                                                                                                                                                                                                                                                                                                              | 1230   |
| #17 | <sup>1-#16</sup>                                                                                                                                                                                                                                                                                                                                                             | 9063   |
| #18 | [mh Psychotherapy] or psychotherap*:ti,ab                                                                                                                                                                                                                                                                                                                                    | 17066  |
| #19 | (Acceptance near/2 Commitment next Therap*):ti,ab or (Cognitive near/2 Therap*):ti,ab or ((interpersonal or psychodynamic or behavioral) next therap*):ti,ab                                                                                                                                                                                                                 | 5015   |
| #20 | #18 or #19                                                                                                                                                                                                                                                                                                                                                                   | 19087  |
| #21 | [mh yoga] or yoga:ti,ab                                                                                                                                                                                                                                                                                                                                                      | 688    |
| #22 | [mh meditation] or (meditation or mindfulness):ti,ab                                                                                                                                                                                                                                                                                                                         | 1064   |
| #23 | [mh Acupuncture] or [mh "Acupuncture Therapy"] or (Acupuncture or Electroacupuncture):ti,ab                                                                                                                                                                                                                                                                                  | 7130   |
| #24 | [mh Hypericum] or "Hypericum":ti,ab or (john* next wort):ti,ab or (LI160 or WS5572 or WS5573 or LoHyp-57):ti,ab                                                                                                                                                                                                                                                              | 295    |
| #25 | ("s adenosyl l methionine" or "s adenosylmethionine"):ti,ab or [mh S-Adenosylmethionine]                                                                                                                                                                                                                                                                                     | 191    |
| #26 | [mh "fatty Acids, Omega-3"] or (omega-3 and fatty next acid*):ti,ab or ("fish oil" or "flax seed" or "borage seed" or Borago or "evening primrose" or Oenothera or "eicosapentaenoic acid" or PUFA):ti,ab                                                                                                                                                                    | 3661   |
| #27 | [mh Exercise] or (physical next (activit* or exercise)):ti,ab                                                                                                                                                                                                                                                                                                                | 18551  |
| #28 | {or #21-#27}                                                                                                                                                                                                                                                                                                                                                                 | 31146  |
| #29 | [mh "Depressive Disorder, Major"] or "major depressive disorder":ti,ab or (major next/1 depress*):ti,ab                                                                                                                                                                                                                                                                      | 6406   |
| #30 | #29 and (#17 or #20 or #28)                                                                                                                                                                                                                                                                                                                                                  | 3544   |
| #31 | #30 Publication Date from 1990 to 2014                                                                                                                                                                                                                                                                                                                                       | 3460   |
| #32 | ([mh infant] or [mh child] or [mh adolescent]) not [mh adult]                                                                                                                                                                                                                                                                                                                | 88056  |
| #33 | #31 not #32                                                                                                                                                                                                                                                                                                                                                                  | 2867   |
| #34 | #31 and (adult or adults):ti,ab                                                                                                                                                                                                                                                                                                                                              | 393    |
| #35 | #33 or #34                                                                                                                                                                                                                                                                                                                                                                   | 2945   |
| #36 | [mh animals] not [mh humans]                                                                                                                                                                                                                                                                                                                                                 | 5655   |
| #37 | #35 not #36 in Other Reviews, Trials, Methods Studies, Technology Assessments, Economic Evaluations and Cochrane Groups                                                                                                                                                                                                                                                      | 2940   |
| #38 | (review:pt and systematic:ti,ab) or "systematic review"                                                                                                                                                                                                                                                                                                                      | 37971  |
| #39 | meta-analysis:pt or (meta next analy*):ti,ab or metaanaly*:ti,ab or [mh Meta-Analysis] or [mh "Meta-Analysis as Topic"]                                                                                                                                                                                                                                                      | 20924  |
| #40 | [mh "Randomized Controlled Trial"] or [mh "Randomized Controlled Trial as topic"] or "randomized controlled trial":pt or [mh "single-blind method"] or [mh "double-blind method"] or [mh "random allocation"] or (randomi?ed next controlled next "trial"):ti,ab                                                                                                             | 377221 |
| #41 | [mh "Controlled Clinical Trial"] or [mh "Controlled Clinical Trials as Topic"] or (controlled next/2 (trial or study)):ti,ab                                                                                                                                                                                                                                                 | 149716 |
| #42 | ([mh "cohort studies"] or (cohort next stud*):ti,ab or [mh "case-control studies"] or (case-control next stud*):ti,ab or (observational next stud*):ti,ab or "observational study":pt or ((observational or longitudinal or retrospective) near/2 (study or trial)):ti,ab) and ("comparative study":pt or [mh "Comparative Study"] or comparison:ti,ab or comparative:ti,ab) | 51743  |

| ID  | Search                                                                                                                  | Hits   |
|-----|-------------------------------------------------------------------------------------------------------------------------|--------|
| #43 | {or #38-#42}                                                                                                            | 458686 |
| #44 | #37 and #43 in Other Reviews, Trials, Methods Studies, Technology Assessments, Economic Evaluations and Cochrane Groups | 2000   |

### Addendum duloxetine 07/05/2014

| No. | Query                                                                                                                                                                                                                                                            | Results |
|-----|------------------------------------------------------------------------------------------------------------------------------------------------------------------------------------------------------------------------------------------------------------------|---------|
| #30 | [mh "Depressive Disorder, Major"] or "major depressive disorder":ti,ab or (major next/1 depress*):ti,ab                                                                                                                                                          | 6406    |
| #31 | #30 and "duloxetine":ti,ab                                                                                                                                                                                                                                       | 163     |
| #32 | #31 Publication Date from 1990 to 2014                                                                                                                                                                                                                           | 163     |
| #33 | ([mh infant] or [mh child] or [mh adolescent]) not [mh adult]                                                                                                                                                                                                    | 88056   |
| #34 | #32 not #33                                                                                                                                                                                                                                                      | 143     |
| #35 | #32 and (adult or adults):ti,ab                                                                                                                                                                                                                                  | 29      |
| #36 | #34 or #35                                                                                                                                                                                                                                                       | 149     |
| #37 | [mh animals] not [mh humans]                                                                                                                                                                                                                                     | 5655    |
| #38 | #36 not #37 in Other Reviews, Trials, Methods Studies, Technology Assessments, Economic Evaluations and Cochrane Groups                                                                                                                                          | 149     |
| #39 | [mh "Randomized Controlled Trial"] or [mh "Randomized Controlled Trial as topic"] or "randomized controlled trial":pt or [mh "single-blind method"] or [mh "double-blind method"] or [mh "random allocation"] or (randomi?ed next controlled next "trial"):ti,ab | 377221  |
| #40 | [mh "Controlled Clinical Trial"] or [mh "Controlled Clinical Trials as Topic"] or (controlled next/2 (trial or study)):ti,ab                                                                                                                                     | 149722  |
| #41 | #38 and (#39 or #40) in Trials                                                                                                                                                                                                                                   | 87      |
| #42 | #38 in Other Reviews                                                                                                                                                                                                                                             | 8       |
| #43 | #42 or #41                                                                                                                                                                                                                                                       | 95      |

### EMBASE 06/05/2014

| No.   | Query                                                                                                                              | Results |
|-------|------------------------------------------------------------------------------------------------------------------------------------|---------|
| #1.1  | 'amfebutamone'/exp OR bupropion:tn,ab,ti OR '34911 55 2':rn                                                                        |         |
| #1.2  | 'citalopram'/exp OR citalopram:tn,ab,ti OR '59729 33 8':rn OR 'escitalopram'/exp OR escitalopram:tn,ab,ti OR '128196 01 0':rn      |         |
| #1.3  | 'desvenlafaxine'/exp OR desvenlafaxine:tn,ab,ti OR '93413 62 8':rn                                                                 |         |
| #1.4  | 'fluoxetine'/exp OR fluoxetine:tn,ab,ti OR '54910 89 3':rn                                                                         |         |
| #1.5  | 'fluvoxamine'/exp OR fluvoxamine:tn,ab,ti OR '54739 18 3':rn                                                                       |         |
| #1.6  | 'milnacipran'/exp OR levomilnacipran:tn,ab,ti OR '96847 54 0':rn                                                                   |         |
| #1.7  | 'mirtazapine'/exp OR mirtazapine:tn,ab,ti OR '85650 52 8':rn                                                                       |         |
| #1.8  | 'nefazodone'/exp OR nefazodone:tn,ab,ti OR '82752 99 6':rn                                                                         |         |
| #1.9  | 'paroxetine'/exp OR paroxetine:tn,ab,ti OR '61869 08 7':rn                                                                         |         |
| #1.10 | 'sertraline'/exp OR sertraline:tn,ab,ti OR '79617 96 2':rn                                                                         |         |
| #1.11 | 'trazodone'/exp OR trazodone:tn,ab,ti OR '19794 93 5':rn                                                                           |         |
| #1.12 | 'venlafaxine'/exp OR venlafaxine:tn,ab,ti OR '93413 69 5':rn                                                                       |         |
| #1.13 | 'vilazodone'/exp OR vilazodone:tn,ab,ti OR '163521 12 8':rn                                                                        |         |
| #1.14 | 'vortioxetine'/exp OR vortioxetine:tn,ab,ti OR '508233 74 7':rn                                                                    |         |
| #1.15 | 'antidepressant agent'/exp AND 'second generation':ab,ti                                                                           |         |
| #1.16 | #1.1 OR #1.2 OR #1.3 OR #1.4 OR #1.5 OR #1.6 OR #1.7 OR #1.8 OR #1.9 OR #1.10 OR #1.11 OR #1.12 OR #1.13 OR #1.14 OR #1.15         | 87062   |
| #1.17 | 'psychotherapy'/exp                                                                                                                | 187201  |
| #1.18 | ((acceptance OR cognitive OR interpersonal OR psychodynamic OR behavioral) NEXT/3 (therapy OR therapies OR psychotherapy)):ab,ti   | 20374   |
| #1.19 | #1.17 OR #1.18 AND 'treatment outcome'/exp                                                                                         | 25169   |
| #1.20 | 'hypericum'/exp OR hypericum:ab,ti OR (john* NEXT/1 wort):ab,ti OR li160:ab,ti OR ws5572:ab,ti OR ws5573:ab,ti OR 'lohyp 57':ab,ti | 4193    |
| #1.21 | 's adenosylmethionine'/exp OR 's adenosylmethionine' OR 's adenosyl I methionine':ab,ti OR 's adenosylmethionine':ab,ti            | 10557   |
| #1.22 | 'omega 3 fatty acid'/exp OR ('omega 3':ab,ti AND acid*:ab,ti) OR 'fish oil':ab,ti OR 'flax                                         | 34034   |

| No.   | Query                                                                                                                                                                                                                                                                                                                                                                                                                                                                                                    | Results  |
|-------|----------------------------------------------------------------------------------------------------------------------------------------------------------------------------------------------------------------------------------------------------------------------------------------------------------------------------------------------------------------------------------------------------------------------------------------------------------------------------------------------------------|----------|
|       | seed':ab,ti OR 'borage seed':ab,ti OR borago:ab,ti OR 'evening primrose':ab,ti OR oenothera:ab,ti OR 'eicosapentaenoic acid':ab,ti OR pufa:ab,ti                                                                                                                                                                                                                                                                                                                                                         |          |
| #1.23 | 'acupuncture'/exp OR acupuncture:ab,ti OR electroacupuncture:ab,ti                                                                                                                                                                                                                                                                                                                                                                                                                                       | 33369    |
| #1.24 | 'yoga'/exp OR yoga:ab,ti                                                                                                                                                                                                                                                                                                                                                                                                                                                                                 | 4138     |
| #1.25 | 'meditation'/exp OR meditation:ab,ti OR mindfulness:ab,ti                                                                                                                                                                                                                                                                                                                                                                                                                                                | 6584     |
| #1.26 | 'exercise'/exp                                                                                                                                                                                                                                                                                                                                                                                                                                                                                           | 209232   |
| #1.27 | #1.20 OR #1.21 OR #1.22 OR #1.23 OR #1.24 OR #1.25 OR #1.26 AND 'treatment outcome'/exp                                                                                                                                                                                                                                                                                                                                                                                                                  | 19807    |
| #1.28 | 'major depression'/exp OR 'major depressive disorder':ab,ti OR (major NEXT/2 depress*):ab,ti                                                                                                                                                                                                                                                                                                                                                                                                             | 52013    |
| #1.29 | #1.28 AND (#1.27 OR #1.19 OR #1.16)                                                                                                                                                                                                                                                                                                                                                                                                                                                                      | 13000    |
| #1.30 | 'systematic review'/exp OR 'meta analysis'/exp OR 'systematic review':ab,ti OR (meta NEXT/1 analy*):ab,ti OR metaanaly*':ab,ti OR (review:it AND systematic:ab,ti) OR (systematic:ab,ti AND (bibliographic:ab,ti OR literature:ab,ti OR review:ab,ti OR reviewed:ab,ti OR reviews:ab,ti)) OR 'research synthesis':ab,ti OR 'research integration':ab,ti OR (comprehensive*':ab,ti AND (bibliographic:ab,ti OR literature:ab,ti)) OR (review:it AND review:ab,ti AND (rationale:ab,ti OR evidence:ab,ti)) | 287380   |
| #1.31 | 'randomized controlled trial'/exp OR (randomi?ed NEXT/1 'controlled trial'):ab,ti OR 'double blind procedure'/exp OR 'single blind procedure'/exp OR 'randomization'/exp OR 'random allocation':ab,ti OR (allocated NEXT/2 random*):ab,ti                                                                                                                                                                                                                                                                | 441315   |
| #1.32 | 'cohort analysis'/exp OR 'case control study'/exp OR 'observational study'/exp OR 'longitudinal study'/exp OR 'prospective study'/exp OR 'retrospective study'/exp OR (cohort NEXT/1 (stud* OR analy*)):ab,ti OR (observational OR 'case control') NEXT/1 stud* OR ((longitudinal OR retrospective OR prospective) NEXT/2 (trial OR study)):ab,ti AND ('comparative study'/exp OR comparative:ab,ti OR comparison:ab,ti)                                                                                 | 149667   |
| #1.33 | 'controlled clinical trial'/exp OR (controlled NEXT/2 (trial* OR stud*)):ab,ti                                                                                                                                                                                                                                                                                                                                                                                                                           | 591400   |
| #1.34 | #1.29 AND (#1.30 OR #1.31 OR #1.32 OR #1.33)                                                                                                                                                                                                                                                                                                                                                                                                                                                             |          |
| #1.35 | 'human'/exp                                                                                                                                                                                                                                                                                                                                                                                                                                                                                              | 14753345 |
| #1.36 | #1.34 AND #1.35                                                                                                                                                                                                                                                                                                                                                                                                                                                                                          | 4575     |
| #1.37 | 'adult'/exp                                                                                                                                                                                                                                                                                                                                                                                                                                                                                              | 5294678  |
| #1.38 | #1.36 AND #1.37                                                                                                                                                                                                                                                                                                                                                                                                                                                                                          | 2399     |
| #1.39 | #1.38 AND [1990-2014]/py                                                                                                                                                                                                                                                                                                                                                                                                                                                                                 | 2374     |
| #1.40 | #1.39 AND [english]/lim                                                                                                                                                                                                                                                                                                                                                                                                                                                                                  | 2316     |
| #1.41 | #1.39 AND (german:la OR italian:la)                                                                                                                                                                                                                                                                                                                                                                                                                                                                      | 17       |
| #1.42 | #1.40 OR #1.41                                                                                                                                                                                                                                                                                                                                                                                                                                                                                           | 2333     |
| #1    |                                                                                                                                                                                                                                                                                                                                                                                                                                                                                                          | 2333     |
| #2    | #1 AND [embase]/lim                                                                                                                                                                                                                                                                                                                                                                                                                                                                                      | 2232     |

### Addendum duloxetine 07.05.2014

| No. | Query                                                                                                                                                                                                                                                                                                                                                                                                                    | Results |
|-----|--------------------------------------------------------------------------------------------------------------------------------------------------------------------------------------------------------------------------------------------------------------------------------------------------------------------------------------------------------------------------------------------------------------------------|---------|
| #6  | 'randomized controlled trial'/exp OR (randomi?ed NEXT/1 'controlled trial'):ab,ti OR 'double blind procedure'/exp OR 'single blind procedure'/exp OR 'randomization'/exp OR 'random allocation':ab,ti OR (allocated NEXT/2 random*):ab,ti                                                                                                                                                                                | 441315  |
| #7  | 'cohort analysis'/exp OR 'case control study'/exp OR 'observational study'/exp OR 'longitudinal study'/exp OR 'prospective study'/exp OR 'retrospective study'/exp OR (cohort NEXT/1 (stud* OR analy*)):ab,ti OR (observational OR 'case control') NEXT/1 stud* OR ((longitudinal OR retrospective OR prospective) NEXT/2 (trial OR study)):ab,ti AND ('comparative study'/exp OR comparative:ab,ti OR comparison:ab,ti) | 149667  |
| #8  | 'controlled clinical trial'/exp OR (controlled NEXT/2 (trial* OR stud*)):ab,ti                                                                                                                                                                                                                                                                                                                                           | 591400  |
| #9  | #5 OR #6 OR #7 OR #8                                                                                                                                                                                                                                                                                                                                                                                                     | 1017694 |
| #10 | #4 AND #9                                                                                                                                                                                                                                                                                                                                                                                                                | 582     |
| #11 | #10 AND 'human'/exp AND 'adult'/exp                                                                                                                                                                                                                                                                                                                                                                                      | 210     |
| #12 | #11 AND [1990-2014]/py AND [embase]/lim                                                                                                                                                                                                                                                                                                                                                                                  | 205     |
| #13 | #12 AND ([english]/lim OR german:la OR italian:la)                                                                                                                                                                                                                                                                                                                                                                       | 205     |

**CINAHL (via Ebsco) 02.05.2014**

| #   | Query                                                                                                                                                                                                                                                                                                                                                                    | Results |
|-----|--------------------------------------------------------------------------------------------------------------------------------------------------------------------------------------------------------------------------------------------------------------------------------------------------------------------------------------------------------------------------|---------|
| S1  | (MH "Bupropion") OR "Bupropion"                                                                                                                                                                                                                                                                                                                                          | 1,072   |
| S2  | (MH "Citalopram") OR "Citalopram"                                                                                                                                                                                                                                                                                                                                        | 644     |
| S3  | "Escitalopram"                                                                                                                                                                                                                                                                                                                                                           | 202     |
| S4  | (MH "Desvenlafaxine Succinate" ) OR TX Desvenlafaxine                                                                                                                                                                                                                                                                                                                    | 49      |
| S5  | (MH "Fluoxetine+") OR "Fluoxetine"                                                                                                                                                                                                                                                                                                                                       | 1,144   |
| S6  | (MH "Fluvoxamine Maleate") OR "Fluvoxamine"                                                                                                                                                                                                                                                                                                                              | 145     |
| S7  | "Levomilnacipran"                                                                                                                                                                                                                                                                                                                                                        | 5       |
| S8  | (MH "Mirtazapine") OR "mirtazapine"                                                                                                                                                                                                                                                                                                                                      | 255     |
| S9  | (MH "Nefazodone") OR "nefazodone"                                                                                                                                                                                                                                                                                                                                        | 68      |
| S10 | (MH "Paroxetine") OR "Paroxetine"                                                                                                                                                                                                                                                                                                                                        | 732     |
| S11 | (MH "Sertraline Hydrochloride") OR "Sertraline"                                                                                                                                                                                                                                                                                                                          | 643     |
| S12 | (MH "Trazodone") OR "Trazodone"                                                                                                                                                                                                                                                                                                                                          | 168     |
| S13 | (MH "Venlafaxine+") OR "venlafaxine"                                                                                                                                                                                                                                                                                                                                     | 605     |
| S14 | "vilazodone"                                                                                                                                                                                                                                                                                                                                                             | 11      |
| S15 | "vortioxetine"                                                                                                                                                                                                                                                                                                                                                           | 5       |
| S16 | (MH "Antidepressive Agents, Second Generation+")                                                                                                                                                                                                                                                                                                                         | 2,806   |
| S17 | S1 OR S2 OR S3 OR S4 OR S5 OR S6 OR S7 OR S8 OR S9 OR S10 OR S11 OR S12 OR S13 OR S14 OR S15 OR S16                                                                                                                                                                                                                                                                      | 4,599   |
| S18 | (MH "Psychotherapy+") OR (TI psychotherap*) OR (AB psychotherap*)                                                                                                                                                                                                                                                                                                        | 86,97   |
| S19 | TI (("Acceptance and Commitment" OR cognitive OR behavioral OR psychodynamic OR interpersonal) N2 therap*) OR AB (("Acceptance and Commitment" OR cognitive OR behavioral OR psychodynamic OR interpersonal) N2 therap*)                                                                                                                                                 | 4,172   |
| S20 | S18 OR S19                                                                                                                                                                                                                                                                                                                                                               | 87,95   |
| S21 | (MH "Yoga+") OR (TI yoga) OR (AB yoga)                                                                                                                                                                                                                                                                                                                                   | 2,268   |
| S22 | (MH "Meditation") OR (TI (meditation OR mindfulness)) OR (AB (meditation OR mindfulness))                                                                                                                                                                                                                                                                                | 2,652   |
| S23 | (MH "St. John's Wort") OR "hypericum" OR (TI john* N2 wort) OR (AB john* N2 wort) OR (TI (LI160 OR WS5572 OR WS5573 OR LoHyp-57)) OR (AB (LI160 OR WS5572 OR WS5573 OR LoHyp-57))                                                                                                                                                                                        | 932     |
| S24 | (MH "Fatty Acids, Omega-3+") OR (TI "omega 3" N1 fatty acid*) OR (AB "omega 3" N1 fatty acid*) OR (TI ("fish oil" OR "flax seed" OR "borage seed" OR Borago OR "evening primrose" OR Oenothera OR "eicosapentaenoic acid" OR PUFA)) OR (AB ("fish oil" OR "flax seed" OR "borage seed" OR Borago OR "evening primrose" OR Oenothera OR "eicosapentaenoic acid" OR PUFA)) | 4,996   |
| S25 | (MH "S-Adenosylmethionine") OR (TI ("s adenosyl l methionine" OR "s adenosylmethionine")) OR (AB ("s adenosyl l methionine" OR "s adenosylmethionine"))                                                                                                                                                                                                                  | 204     |
| S26 | (MH "Acupuncture+") OR (TI (acupuncture OR electroacupuncture)) OR (AB (acupuncture OR electroacupuncture))                                                                                                                                                                                                                                                              | 8,556   |
| S27 | (MH "Exercise+") OR TI (physical N1 (activit* OR exercise)) OR AB (physical N1 (activit* OR exercise))                                                                                                                                                                                                                                                                   | 65,646  |
| S28 | S21 OR S22 OR S23 OR S24 OR S25 OR S26 OR S27                                                                                                                                                                                                                                                                                                                            | 83,353  |
| S29 | (MH "Depression+") AND (TX major N2 depress*)                                                                                                                                                                                                                                                                                                                            | 3,393   |
| S30 | TI ( major n2 depress* OR "major depressive disorder" ) OR AB ( major n2 depress* OR "major depressive disorder" )                                                                                                                                                                                                                                                       | 3,998   |
| S31 | S29 OR S30                                                                                                                                                                                                                                                                                                                                                               | 4,08    |
| S32 | S31 AND (S17 OR S20 OR S28)                                                                                                                                                                                                                                                                                                                                              | 1,115   |
| S33 | (MH "Animals") NOT (MH "Human")                                                                                                                                                                                                                                                                                                                                          | 24,505  |
| S34 | S32 NOT S33                                                                                                                                                                                                                                                                                                                                                              | 1,114   |
| S35 | ( (MH "Infant") OR (MH "Child") OR (MH "Adolescence") ) NOT (MH "Adult+")                                                                                                                                                                                                                                                                                                | 221,397 |
| S36 | S34 NOT S35                                                                                                                                                                                                                                                                                                                                                              | 1,012   |
| S37 | S36 AND (PY 1990-2014) AND (LA (english OR german Or italian))                                                                                                                                                                                                                                                                                                           | 1,003   |
| S38 | S37 NOT (PT (editorial OR letter OR commentary))                                                                                                                                                                                                                                                                                                                         | 867     |

### Addendum duloxetine 07.05.2014

| #   | Query                                                                                                              | Results |
|-----|--------------------------------------------------------------------------------------------------------------------|---------|
| S1  | (MH "Duloxetine Hydrochloride") OR (TX Duloxetine)                                                                 | 378     |
| S2  | (MH "Depression+") AND (TX major N2 depress*)                                                                      | 3,397   |
| S3  | T1 ( major n2 depress* OR "major depressive disorder" ) OR AB ( major n2 depress* OR "major depressive disorder" ) | 4       |
| S4  | S2 OR S3                                                                                                           | 4,082   |
| S5  | S4 AND S1                                                                                                          | 51      |
| S6  | (MH "Animals") NOT (MH "Human")                                                                                    | 24,582  |
| S7  | S5 NOT S6                                                                                                          | 51      |
| S8  | ( (MH "Infant") OR (MH "Child") OR (MH "Adolescence") ) NOT (MH "Adult+")                                          | 221,684 |
| S9  | S7 NOT S8                                                                                                          | 51      |
| S10 | S9 AND (PY 1990-2014) AND (LA (english OR german Or italian))                                                      | 51      |
| S11 | S10 NOT (PT (editorial OR letter OR commentary))                                                                   | 50      |

### AMED (via Ovid) 02.05.2014

| #  | Suchen                                                                                                                                                                      | Ergebnisse |
|----|-----------------------------------------------------------------------------------------------------------------------------------------------------------------------------|------------|
| 1  | exp antidepressive agents/                                                                                                                                                  | 272        |
| 2  | Bupropion.mp.                                                                                                                                                               | 15         |
| 3  | Citalopram.mp.                                                                                                                                                              | 9          |
| 4  | Escitalopram.mp.                                                                                                                                                            | 3          |
| 5  | (Desvenlafaxine or O-desmethylvenlafaxine).mp.                                                                                                                              | 0          |
| 6  | Fluoxetine.mp.                                                                                                                                                              | 50         |
| 7  | Levomilnacipran.mp.                                                                                                                                                         | 0          |
| 8  | mirtazapine.mp.                                                                                                                                                             | 6          |
| 9  | (nefazodone or Paroxetine or Sertraline or Trazodone or venlafaxine or vilazodone or vortioxetine).mp.                                                                      | 69         |
| 10 | 1 or 2 or 3 or 4 or 5 or 6 or 7 or 8 or 9                                                                                                                                   | 363        |
| 11 | exp psychotherapy/                                                                                                                                                          | 8542       |
| 12 | ((acceptance or cognitive or interpersonal or psychodynamic or behavioral) adj3 (therap\$ or psychotherap\$)).mp.                                                           | 1395       |
| 13 | 11 or 12                                                                                                                                                                    | 8895       |
| 14 | exp fatty acids/ or exp fish oils/ or (omega 3 and acid*).mp. or (flax seed or borage seed or Borago or evening primrose or Oenothera or eicosapentaenoic acid or PUFA).mp. | 640        |
| 15 | exp hypericum/ or (hypericum or (john\$ adj1 wort)).mp. or (LI160 or WS5572 or WS5573 or LoHyp-57).mp.                                                                      | 415        |
| 16 | (S-Adenosylmethionine or s adenosyl I methionine).mp.                                                                                                                       | 21         |
| 17 | exp acupuncture/ or exp electroacupuncture/ or (acupuncture or electroacupuncture).mp.                                                                                      | 9182       |
| 18 | exp meditation/ or (meditation or mindfulness).mp.                                                                                                                          | 658        |
| 19 | exp Yoga/ or yoga.mp.                                                                                                                                                       | 501        |
| 20 | (physical adj1 (activit* or exercise)).mp. or exp Exercise/                                                                                                                 | 9857       |
| 21 | 14 or 15 or 16 or 17 or 18 or 19 or 20                                                                                                                                      | 20984      |
| 22 | exp depressive disorder/                                                                                                                                                    | 890        |
| 23 | ((major adj2 depress\$) or major depressive disorder).mp.                                                                                                                   | 352        |
| 24 | 22 or 23                                                                                                                                                                    | 1126       |
| 25 | 10 or 13 or 21                                                                                                                                                              | 29843      |
| 26 | 24 and 25                                                                                                                                                                   | 283        |
| 27 | 26                                                                                                                                                                          | 283        |
| 28 | limit 27 to yr="1990 -Current"                                                                                                                                              | 282        |
| 29 | (exp infant/ or exp child/ or exp adolescent/) not exp adult/                                                                                                               | 15352      |
| 30 | 28 not 29                                                                                                                                                                   | 269        |
| 31 | 28 and (adult or adults).ti,ab.                                                                                                                                             | 39         |
| 32 | 30 or 31                                                                                                                                                                    | 271        |



**Addendum duloxetine 07.05.2014**

| # | Suchen                                                    | Ergebnisse |
|---|-----------------------------------------------------------|------------|
| 1 | duloxetine.mp.                                            | 22         |
| 2 | exp depressive disorder/                                  | 894        |
| 3 | ((major adj2 depress\$) or major depressive disorder).mp. | 353        |
| 4 | 2 or 3                                                    | 1131       |
| 5 | 1 and 4                                                   | 5          |

**PsycInfo (via Ebsco) 02.05.2014**

| #   | Query                                                                                                                                                                                                                                                                                                                                                                                                                                                                                                         | Results |
|-----|---------------------------------------------------------------------------------------------------------------------------------------------------------------------------------------------------------------------------------------------------------------------------------------------------------------------------------------------------------------------------------------------------------------------------------------------------------------------------------------------------------------|---------|
| S1  | TX ( Bupropion OR Citalopram OR Escitalopram OR O-desmethylvenlafaxine OR Desvenlafaxine OR Fluoxetine OR Fluvoxamine OR Levomilnacipran OR mirtazapine OR nefazodone OR Paroxetine OR Sertraline OR Trazodone OR venlafaxine OR vilazodone OR vortioxetine )                                                                                                                                                                                                                                                 | 15,857  |
| S2  | DE "antidepressant drugs" AND TX (second generation)                                                                                                                                                                                                                                                                                                                                                                                                                                                          | 144     |
| S3  | S1 OR S2                                                                                                                                                                                                                                                                                                                                                                                                                                                                                                      | 15,958  |
| S4  | (DE "acceptance and commitment therapy") or ((DE "cognitive therapy") or (DE "behavior therapy")) OR (DE psychotherapy)                                                                                                                                                                                                                                                                                                                                                                                       | 64,196  |
| S5  | TI ( (acceptance and commitment therap*) OR (cognitive N2 therap*) OR (behavior* therap) OR (interpersonal therap*) OR (psychodynamic therap*) ) OR AB ( (acceptance and commitment therap*) OR (cognitive N2 therap*) OR (behavior* therap) OR (interpersonal therap*) OR (psychodynamic therap*) )                                                                                                                                                                                                          | 24,311  |
| S6  | S4 OR S5                                                                                                                                                                                                                                                                                                                                                                                                                                                                                                      | 78,648  |
| S7  | (DE acupuncture) OR (TX (acupuncture OR electroacupuncture))                                                                                                                                                                                                                                                                                                                                                                                                                                                  | 1,717   |
| S8  | (DE meditation) OR (TX (meditation OR mindfulness))                                                                                                                                                                                                                                                                                                                                                                                                                                                           | 8,986   |
| S9  | (DE hypericum perforatum) OR (TX (hypericum OR (john* N1 wort) OR LI160 OR WS5572 OR WS5573 LoHyp-57))                                                                                                                                                                                                                                                                                                                                                                                                        | 392     |
| S10 | (DE yoga) OR (TX yoga)                                                                                                                                                                                                                                                                                                                                                                                                                                                                                        | 1,907   |
| S11 | TX ((omega-3 N1 fatty acid*) OR "fish oil" OR "flax seed" OR "borage seed" OR Borago OR "evening primrose" OR Oenothera OR "eicosapentaenoic acid" OR PUFA)                                                                                                                                                                                                                                                                                                                                                   | 982     |
| S12 | TX ("s adenosyl l methionine" OR "s adenosylmethionine")                                                                                                                                                                                                                                                                                                                                                                                                                                                      | 205     |
| S13 | DE exercise OR TI physical activit* OR AB physical activit*                                                                                                                                                                                                                                                                                                                                                                                                                                                   | 30,086  |
| S14 | S7 OR S8 OR S9 OR S10 OR S11 OR S12 OR S13                                                                                                                                                                                                                                                                                                                                                                                                                                                                    | 43,124  |
| S15 | DE ( "major depressive disorder" OR "Major Depression" ) OR TI ( "major depressive disorder" OR (Major N2 Depress*) ) OR AB ( "major depressive disorder" OR (Major N2 Depress*) )                                                                                                                                                                                                                                                                                                                            | 94,026  |
| S16 | S15 AND (S3 OR S6 OR S14)                                                                                                                                                                                                                                                                                                                                                                                                                                                                                     | 13,953  |
| S17 | TI ( controlled N2 (trial OR study) ) OR AB ( controlled N2 (trial OR study) )                                                                                                                                                                                                                                                                                                                                                                                                                                | 36,244  |
| S18 | TI (randomi*ed controlled trial) OR AB (randomi*ed controlled trial) OR TI (random* N4 (trial OR study)) OR AB (random* N4 (trial OR study))                                                                                                                                                                                                                                                                                                                                                                  | 39,503  |
| S19 | TI ( "double-blind" OR (random* assigned) OR "single-blind" ) OR AB ( "double-blind" OR (random* assigned) OR "single-blind")                                                                                                                                                                                                                                                                                                                                                                                 | 42,931  |
| S20 | TI ( systematic N3 (bibliographic OR literature OR review# OR reviewed) ) OR AB ( systematic N3 (bibliographic OR literature OR review# OR reviewed) ) OR ( comprehensive N3 (bibliographic OR literature) ) OR ( (TI "research integration") OR (AB "research integration") ) OR ( (TI "research synthesis") Or (AB "research synthesis") ) OR ( (TI metaanaly* OR meta-analy*) OR (AB metaanaly* OR meta-analy*) ) OR ( MR ("systematic review" OR "meta analysis") )                                       | 31,825  |
| S21 | ((MR "longitudinal study" OR "retrospective study" OR "prospective study") OR (DE "cohort analysis") OR TI ( (cohort N1 (analy* OR stud*)) OR ((observational OR "case control") N1 stud*) OR ((longitudinal OR retrospective OR prospective) N2 (trial OR study)) ) OR AB ( (cohort N1 (analy* OR stud*)) OR ((observational OR "case control") N1 stud*) OR ((longitudinal OR retrospective OR prospective) N2 (trial OR study)) ) ) AND (TI (comparative OR comparison) OR AB (comparative OR comparison)) | 10,731  |
| S22 | (S17 OR S18 OR S19 OR S20 OR S21) NOT ((ZZ "comment/reply") OR (ZZ "editorial") OR (ZZ "letter"))                                                                                                                                                                                                                                                                                                                                                                                                             | 113,102 |
| S23 | S16 AND S22                                                                                                                                                                                                                                                                                                                                                                                                                                                                                                   | 3,595   |
| S24 | ((ZP "animal")) not ((ZP "human"))                                                                                                                                                                                                                                                                                                                                                                                                                                                                            | 279,088 |

| #   | Query                                                                                                                                    | Results   |
|-----|------------------------------------------------------------------------------------------------------------------------------------------|-----------|
| S25 | S23 NOT S24                                                                                                                              | 3,586     |
| S26 | ((ZG "childhood (birth-12 yrs)" or (ZG "infancy (2-23 mo)")) or ((ZG "adolescence (13-17 yrs)")) not ((ZG "adulthood (18 yrs & older)")) | 396,672   |
| S27 | S25 NOT S26                                                                                                                              | 3,4       |
| S28 | LA (english OR german OR italian)                                                                                                        | 3,441,047 |
| S29 | PY 1990-2014                                                                                                                             | 2,451,294 |
| S30 | S27 AND S28 AND S29                                                                                                                      | 3,172     |

### Addendum duloxetine 07.05.2014

| #   | Query                                                                                                                                                                                                                                                                                                                                                                                                                                                                                                       | Results   |
|-----|-------------------------------------------------------------------------------------------------------------------------------------------------------------------------------------------------------------------------------------------------------------------------------------------------------------------------------------------------------------------------------------------------------------------------------------------------------------------------------------------------------------|-----------|
| S1  | DE ( "major depressive disorder" OR "Major Depression" ) OR TI ( "major depressive disorder" OR (Major N2 Depress*) ) OR AB ( "major depressive disorder" OR (Major N2 Depress*) )                                                                                                                                                                                                                                                                                                                          | 94,027    |
| S2  | S1 AND (TX duloxetine)                                                                                                                                                                                                                                                                                                                                                                                                                                                                                      | 375       |
| S3  | TI ( controlled N2 (trial OR study) ) OR AB ( controlled N2 (trial OR study) )                                                                                                                                                                                                                                                                                                                                                                                                                              | 36,244    |
| S4  | TI (randomi*ed controlled trial) OR AB (randomi*ed controlled trial) OR TI (random* N4 (trial OR study)) OR AB (random* N4 (trial OR study))                                                                                                                                                                                                                                                                                                                                                                | 39,503    |
| S5  | TI ( "double-blind" OR (random* assigned) OR "single-blind" ) OR AB ( "double-blind" OR (random* assigned) OR "single-blind" )                                                                                                                                                                                                                                                                                                                                                                              | 42,931    |
| S6  | TI ( systematic N3 (bibliographic OR literature OR review# OR reviewed) ) OR AB ( systematic N3 (bibliographic OR literature OR review# OR reviewed) ) OR ( comprehensive N3 (bibliographic OR literature) ) OR ( TI "research integration" ) OR ( AB "research integration" ) OR ( TI "research synthesis" ) OR ( AB "research synthesis" ) OR ( TI metaanaly* OR meta-analy* ) OR ( AB metaanaly* OR meta-analy* ) ) OR ( MR ("systematic review" OR "meta analysis" ) )                                  | 31,825    |
| S7  | ((MR "longitudinal study" OR "retrospective study" OR "prospective study") OR (DE "cohort analysis" OR TI ( (cohort N1 (analy* OR stud*)) OR ((observational OR "case control") N1 stud*) OR ((longitudinal OR retrospective OR prospective) N2 (trial OR study)) ) OR AB ( (cohort N1 (analy* OR stud*)) OR ((observational OR "case control") N1 stud*) OR ((longitudinal OR retrospective OR prospective) N2 (trial OR study)) )) AND (TI (comparative OR comparison) OR AB (comparative OR comparison)) | 10,731    |
| S8  | (S3 OR S4 OR S5 OR S6 OR S7) NOT ((ZZ "comment/reply") OR (ZZ "editorial") OR (ZZ "letter"))                                                                                                                                                                                                                                                                                                                                                                                                                | 113,102   |
| S9  | S2 AND S8                                                                                                                                                                                                                                                                                                                                                                                                                                                                                                   | 161       |
| S10 | ((ZP "animal") not ((ZP "human"))                                                                                                                                                                                                                                                                                                                                                                                                                                                                           | 279,088   |
| S11 | S9 NOT S10                                                                                                                                                                                                                                                                                                                                                                                                                                                                                                  | 161       |
| S12 | ((ZG "childhood (birth-12 yrs)" or (ZG "infancy (2-23 mo)")) or ((ZG "adolescence (13-17 yrs)")) not ((ZG "adulthood (18 yrs & older)"))                                                                                                                                                                                                                                                                                                                                                                    | 396,672   |
| S13 | S11 NOT S12                                                                                                                                                                                                                                                                                                                                                                                                                                                                                                 | 161       |
| S14 | LA (english OR german OR italian)                                                                                                                                                                                                                                                                                                                                                                                                                                                                           | 3,441,047 |
| S15 | PY 1990-2014                                                                                                                                                                                                                                                                                                                                                                                                                                                                                                | 2,451,294 |
| S16 | S13 AND S14 AND S15                                                                                                                                                                                                                                                                                                                                                                                                                                                                                         | 154       |

## Update Searches

### MEDLINE via PubMed 12 January 2015

| Search | Query                                                                                                                                                                                                                                            | Items found |
|--------|--------------------------------------------------------------------------------------------------------------------------------------------------------------------------------------------------------------------------------------------------|-------------|
| #1     | Search "Bupropion"[Mesh] OR "Bupropion"[tiab] OR 34911-55-2[rn]                                                                                                                                                                                  | 3714        |
| #2     | Search "Citalopram"[Mesh] OR "Citalopram"[tiab] OR 59729-33-8[rn]                                                                                                                                                                                | 5305        |
| #3     | Search Escitalopram[tw] OR 128196-01-0[rn]                                                                                                                                                                                                       | 4250        |
| #4     | Search "O-desmethylvenlafaxine" [Supplementary Concept] OR Desvenlafaxine[tiab] OR 93413-62-8[rn]                                                                                                                                                | 255         |
| #5     | Search "Fluoxetine"[Mesh] OR "Fluoxetine"[tiab] OR 54910-89-3[rn]                                                                                                                                                                                | 11275       |
| #6     | Search "Fluvoxamine"[Mesh] OR "Fluvoxamine"[tiab] OR 54739-18-3[rn]                                                                                                                                                                              | 2609        |
| #7     | Search "milnacipran"[Supplementary Concept] OR "Levomilnacipran"[tiab] OR 96847-54-0[rn]                                                                                                                                                         | 372         |
| #8     | Search "mirtazapine"[Supplementary Concept] OR "mirtazapine"[tiab] OR 85650-52-8[rn]                                                                                                                                                             | 1650        |
| #9     | Search "nefazodone"[Supplementary Concept] OR "nefazodone"[tiab] OR 82752-99-6[rn]                                                                                                                                                               | 715         |
| #10    | Search "Paroxetine"[Mesh] OR "Paroxetine"[tiab] OR 61869-08-7[rn]                                                                                                                                                                                | 5379        |
| #11    | Search "Sertraline"[Mesh] OR "Sertraline"[tiab] OR 79617-96-2[rn]                                                                                                                                                                                | 3875        |
| #12    | Search "Trazodone"[Mesh] OR "Trazodone"[tiab] OR 19794-93-5[rn]                                                                                                                                                                                  | 1716        |
| #13    | Search "venlafaxine"[Supplementary Concept] OR "venlafaxine"[tiab] OR 93413-69-5[rn]                                                                                                                                                             | 3290        |
| #14    | Search "vilazodone"[Supplementary Concept] OR "vilazodone"[tiab] OR 163521-12-8[rn]                                                                                                                                                              | 83          |
| #15    | Search "vortioxetine"[Supplementary Concept] OR "vortioxetine"[tiab] OR 508233-74-7[rn]                                                                                                                                                          | 75          |
| #16    | Search "duloxetine" [Supplementary Concept] OR duloxetine[tiab]                                                                                                                                                                                  | 1778        |
| #17    | Search "Antidepressive Agents, Second-Generation"[Mesh] OR "Antidepressive Agents, Second-Generation"[Pharmacological Action]                                                                                                                    | 58607       |
| #18    | Search #17 OR #16 OR #15 OR #14 OR #13 OR #12 OR #11 OR #10 OR #9 OR #8 OR #7 OR #6 OR #5 OR #4 OR #3 OR #2 OR #1                                                                                                                                | 69934       |
| #19    | Search "Psychotherapy"[Mesh] OR psychotherap*[tiab]                                                                                                                                                                                              | 160809      |
| #20    | Search Acceptance and Commitment Therap*[tiab] OR Cognitive Therap*[tiab] OR Cognitive behavioral Therap*[tiab] OR interpersonal therap*[tiab] OR psychodynamic therap*[tiab] OR behavioral therap*[tiab]                                        | 8733        |
| #21    | Search (#19 OR #20)                                                                                                                                                                                                                              | 163324      |
| #22    | Search "Hypericum"[Mesh] OR Hypericum[tiab] OR St. Johns Wort[tiab] OR Saint Johns Wort[tiab] OR St. John's Wort[tiab] OR Saint John's Wort[tiab] OR LI160[tiab] OR WS5572[tiab] OR WS5573[tiab] OR LoHyp-57[tiab]                               | 2688        |
| #23    | Search "s adenosyl l methionine"[tiab] OR "s adenosylmethionine"[tiab] OR "S-Adenosylmethionine"[Mesh]                                                                                                                                           | 9025        |
| #24    | Search "Fatty Acids, Omega-3"[Mesh] OR (omega 3[tiab] AND fatty acid*[tiab]) OR fish oil[tiab] OR flax seed[tiab] OR borage seed[tiab] OR Borago[tiab] OR evening primrose[tiab] OR Oenothera[tiab] OR eicosapentaenoic acid[tiab] OR PUFA[tiab] | 29253       |
| #25    | Search "Acupuncture"[Mesh] OR "Acupuncture Therapy"[Mesh] OR Acupuncture[tiab] OR Electroacupuncture[tiab]                                                                                                                                       | 21423       |
| #26    | Search "Yoga"[Mesh] OR yoga[tiab]                                                                                                                                                                                                                | 2633        |
| #27    | Search "Meditation"[Mesh] OR meditation[tiab] OR mindfulness[tiab]                                                                                                                                                                               | 4674        |
| #28    | Search "Exercise"[Mesh] OR physical activit*[tiab] OR "physical exercise"[tiab]                                                                                                                                                                  | 169750      |
| #29    | Search #22 OR #23 OR #24 OR #25 OR #26 OR #27 OR #28                                                                                                                                                                                             | 237070      |
| #30    | Search "Depressive Disorder, Major"[MeSH] OR "major depressive disorder"[tiab] OR "major depression"[tiab]                                                                                                                                       | 37436       |
| #31    | Search (#30 AND #18)                                                                                                                                                                                                                             | 5363        |
| #32    | Search (#30 AND #21)                                                                                                                                                                                                                             | 3258        |
| #33    | Search (#30 AND #29)                                                                                                                                                                                                                             | 808         |
| #34    | Search (#31 OR #32 OR #33)                                                                                                                                                                                                                       | 8749        |
| #35    | Search (systematic*[tiab] AND (bibliographic*[tiab] OR literature[tiab] OR review[tiab])                                                                                                                                                         | 265837      |

| Search | Query                                                                                                                                                                                                                                                                                                                                                                                                                                          | Items found |
|--------|------------------------------------------------------------------------------------------------------------------------------------------------------------------------------------------------------------------------------------------------------------------------------------------------------------------------------------------------------------------------------------------------------------------------------------------------|-------------|
|        | OR reviewed[tiab] OR reviews[tiab])) OR (comprehensive*[tiab] AND (bibliographic*[tiab] OR literature[tiab])) OR "research synthesis"[tiab] OR "research integration"[tiab] OR meta-analy*[tiab] OR metaanaly*[tiab] OR "meta-analysis as topic"[mh] OR "Meta-Analysis"[pt] OR ("review"[tiab] AND ("rationale"[tiab] OR "evidence"[tiab]) AND review[pt]) OR "Systematic Review"[tiab] OR ("Review"[Publication Type] AND "systematic"[tiab]) |             |
| #36    | Search ("Randomized Controlled Trial"[Publication Type] OR "Randomized Controlled Trials as Topic"[MeSH] OR "Randomized Controlled Trial"[tiab] OR "Single-Blind Method"[MeSH] OR "Double-Blind Method"[MeSH] OR "Random Allocation"[MeSH])                                                                                                                                                                                                    | 565406      |
| #37    | Search (("cohort studies"[MeSH] OR cohort stud*[tiab] OR cohort analy*[tiab] OR "Case-Control Studies"[Mesh] OR case control stud*[tiab] OR observational stud*[tiab] OR "observational study"[pt] OR ((longitudinal[tiab] OR retrospective[tiab] OR prospective[tiab]) AND (study[tiab] OR trial[tiab]))) AND ("Comparative Study"[pt] OR comparison[tiab] OR comparative[tiab]))                                                             | 363532      |
| #38    | Search ("Controlled Clinical Trial"[pt] OR "Controlled Clinical Trials as Topic"[Mesh] OR controlled clinical trial*[tiab] OR controlled trial*[tiab] OR controlled stud*[tiab])                                                                                                                                                                                                                                                               | 334900      |
| #39    | Search (#34 AND (#35 OR #36 OR #37 OR #38))                                                                                                                                                                                                                                                                                                                                                                                                    | 4018        |
| #40    | Search "Animals"[Mesh] NOT "Humans"[Mesh]                                                                                                                                                                                                                                                                                                                                                                                                      | 3963556     |
| #41    | Search (#39 NOT #40)                                                                                                                                                                                                                                                                                                                                                                                                                           | 4011        |
| #42    | Search ("Infant"[Mesh] OR "Child"[Mesh] OR "Adolescent"[Mesh]) NOT "Adult"[Mesh]                                                                                                                                                                                                                                                                                                                                                               | 1523966     |
| #43    | Search (#41 NOT #42)                                                                                                                                                                                                                                                                                                                                                                                                                           | 3767        |
| #44    | Search #43 AND 2014:2015[dp] AND (english[la] OR german[la] OR italian[la])                                                                                                                                                                                                                                                                                                                                                                    | 202         |

## Cochrane Library 12 January 2015

| ID  | Search                                                                                                                                                       | Hits  |
|-----|--------------------------------------------------------------------------------------------------------------------------------------------------------------|-------|
| #1  | [mh Bupropion] or Bupropion:ti,ab                                                                                                                            | 990   |
| #2  | [mh Citalopram] or Citalopram:ti,ab                                                                                                                          | 1238  |
| #3  | Escitalopram:ti,ab                                                                                                                                           | 655   |
| #4  | Desvenlafaxine:ti,ab                                                                                                                                         | 83    |
| #5  | [mh Fluoxetine] or Fluoxetine:ti,ab                                                                                                                          | 2423  |
| #6  | [mh Fluvoxamine] or Fluvoxamine:ti,ab                                                                                                                        | 693   |
| #7  | Levomilnacipran:ti,ab                                                                                                                                        | 15    |
| #8  | mirtazapine:ti,ab                                                                                                                                            | 457   |
| #9  | nefazodone:ti,ab                                                                                                                                             | 194   |
| #10 | [mh Paroxetine] or Paroxetine:ti,ab                                                                                                                          | 1814  |
| #11 | [mh Sertraline] or sertraline:ti,ab                                                                                                                          | 1415  |
| #12 | [mh Trazodone] or Trazodone:ti,ab                                                                                                                            | 342   |
| #13 | venlafaxine:ti,ab                                                                                                                                            | 1030  |
| #14 | vilazodone:ti,ab                                                                                                                                             | 26    |
| #15 | vortioxetine:ti,ab                                                                                                                                           | 18    |
| #16 | duloxetine:ti,ab                                                                                                                                             | 541   |
| #17 | [mh "Antidepressive Agents, Second-Generation"]                                                                                                              | 1236  |
| #18 | <sup>†</sup> #17                                                                                                                                             | 9842  |
| #19 | [mh Psychotherapy] or psychotherap*:ti,ab                                                                                                                    | 17633 |
| #20 | (Acceptance near/2 Commitment next Therap*):ti,ab or (Cognitive near/2 Therap*):ti,ab or ((interpersonal or psychodynamic or behavioral) next therap*):ti,ab | 5514  |
| #21 | #19 or #20                                                                                                                                                   | 20047 |
| #22 | [mh yoga] or yoga:ti,ab                                                                                                                                      | 856   |
| #23 | [mh meditation] or (meditation or mindfulness):ti,ab                                                                                                         | 1296  |
| #24 | [mh Acupuncture] or [mh "Acupuncture Therapy"] or (Acupuncture or Electroacupuncture):ti,ab                                                                  | 7617  |
| #25 | [mh Hypericum] or "Hypericum":ti,ab or (john* next wort):ti,ab or (L160 or WS5572 or WS5573 or LoHyp-57):ti,ab                                               | 302   |
| #26 | ("s adenosyl l methionine" or "s adenosylmethionine"):ti,ab or [mh S-Adenosylmethionine]                                                                     | 202   |
| #27 | [mh "fatty Acids, Omega-3"] or (omega-3 and fatty next acid*):ti,ab or ("fish oil" or "flax                                                                  | 3983  |

| ID  | Search                                                                                                        | Hits  |
|-----|---------------------------------------------------------------------------------------------------------------|-------|
|     | seed" or "borage seed" or Borago or "evening primrose" or Oenothera or "eicosapentaenoic acid" or PUFA):ti,ab |       |
| #28 | [mh Exercise] or (physical next (activit* or exercise)):ti,ab                                                 | 19836 |
| #29 | {or #22-#28}                                                                                                  | 33596 |
| #30 | [mh "Depressive Disorder, Major"] or "major depressive disorder":ti,ab or (major next/1 depress*):ti,ab       | 6816  |
| #31 | #30 and (#18 or #21 or #29)                                                                                   | 3847  |
| #32 | #31 Publication Year from 2014                                                                                | 119   |
| #33 | [mh animals] not [mh humans]                                                                                  | 5683  |
| #34 | #32 not #33                                                                                                   | 119   |
| #35 | ([mh infant] or [mh child] or [mh adolescent]) not [mh adult]                                                 | 88719 |
| #36 | #34 not #35                                                                                                   | 119   |

### Embase (embase.com) 13 January 2015

| No. | Query                                                                                                                                                                                                                                       | Results |
|-----|---------------------------------------------------------------------------------------------------------------------------------------------------------------------------------------------------------------------------------------------|---------|
| #1  | 'amfebutamone'/exp OR bupropion:tn,ab,ti OR '34911 55 2':rn                                                                                                                                                                                 | 14498   |
| #2  | 'citalopram'/exp OR citalopram:tn,ab,ti OR '59729 33 8':rn                                                                                                                                                                                  | 18173   |
| #3  | 'escitalopram'/exp OR escitalopram:tn,ab,ti OR '128196 01 0':rn                                                                                                                                                                             | 7453    |
| #4  | 'desvenlafaxine'/exp OR desvenlafaxine:tn,ab,ti OR '93413 62 8':rn                                                                                                                                                                          | 926     |
| #5  | 'fluoxetine'/exp OR fluoxetine:tn,ab,ti OR '54910 89 3':rn                                                                                                                                                                                  | 38642   |
| #6  | 'fluvoxamine'/exp OR fluvoxamine:tn,ab,ti OR '54739 18 3':rn                                                                                                                                                                                | 11640   |
| #7  | 'milnacipran'/exp OR levomilnacipran:tn,ab,ti OR '96847 54 0':rn                                                                                                                                                                            | 2006    |
| #8  | 'mirtazapine'/exp OR mirtazapine:tn,ab,ti OR '85650 52 8':rn                                                                                                                                                                                | 9260    |
| #9  | 'nefazodone'/exp OR nefazodone:tn,ab,ti OR '82752 99 6':rn                                                                                                                                                                                  | 4885    |
| #10 | 'paroxetine'/exp OR paroxetine:tn,ab,ti OR '61869 08 7':rn                                                                                                                                                                                  | 23598   |
| #11 | 'sertraline'/exp OR sertraline:tn,ab,ti OR '79617 96 2':rn                                                                                                                                                                                  | 20413   |
| #12 | 'trazodone'/exp OR trazodone:tn,ab,ti OR '19794 93 5':rn                                                                                                                                                                                    | 10064   |
| #13 | 'venlafaxine'/exp OR venlafaxine:tn,ab,ti OR '93413 69 5':rn                                                                                                                                                                                | 16550   |
| #14 | 'vilazodone'/exp OR vilazodone:tn,ab,ti OR '163521 12 8':rn                                                                                                                                                                                 | 264     |
| #15 | 'vortioxetine'/exp OR vortioxetine:tn,ab,ti OR '508233 74 7':rn                                                                                                                                                                             | 231     |
| #16 | 'duloxetine'/exp OR '116539 59 4':rn OR duloxetine:tn,ab,ti                                                                                                                                                                                 | 7135    |
| #17 | 'antidepressant agent'/exp AND 'second generation':ab,ti OR (antidep* NEAR/2 'second generation'):ab,ti                                                                                                                                     | 1393    |
| #18 | #1 OR #2 OR #3 OR #4 OR #5 OR #6 OR #7 OR #8 OR #9 OR #10 OR #11 OR #12 OR #13 OR #14 OR #15 OR #16 OR #17                                                                                                                                  | 93111   |
| #19 | 'psychotherapy'/exp                                                                                                                                                                                                                         | 193315  |
| #20 | ((acceptance OR cognitive OR interpersonal OR psychodynamic OR behavioral) NEXT/3 (therapy OR therapies OR psychotherapy)):ab,ti                                                                                                            | 21899   |
| #21 | #19 OR #20                                                                                                                                                                                                                                  | 195814  |
| #22 | 'hypericum'/exp OR hypericum:ab,ti OR (john* NEXT/1 wort):ab,ti OR li160:ab,ti OR ws5572:ab,ti OR ws5573:ab,ti OR 'lohyp 57':ab,ti                                                                                                          | 4330    |
| #23 | 's adenosylmethionine'/exp OR 's adenosylmethionine' OR 's adenosyl I methionine':ab,ti OR 's adenosylmethionine':ab,ti                                                                                                                     | 10883   |
| #24 | 'omega 3 fatty acid'/exp OR ('omega 3':ab,ti AND acid*:ab,ti) OR 'fish oil':ab,ti OR 'flax seed':ab,ti OR 'borage seed':ab,ti OR borago:ab,ti OR 'evening primrose':ab,ti OR oenothera:ab,ti OR 'eicosapentaenoic acid':ab,ti OR pufa:ab,ti | 35965   |
| #25 | 'acupuncture'/exp OR acupuncture:ab,ti OR electroacupuncture:ab,ti                                                                                                                                                                          | 34890   |
| #26 | 'yoga'/exp OR yoga:ab,ti                                                                                                                                                                                                                    | 4566    |
| #27 | 'meditation'/exp OR meditation:ab,ti OR mindfulness:ab,ti                                                                                                                                                                                   | 7307    |
| #28 | 'exercise'/exp OR (physical NEXT/2 (activit* OR exercis*)):ab,ti                                                                                                                                                                            | 284231  |
| #29 | #22 OR #23 OR #24 OR #25 OR #26 OR #27 OR #28                                                                                                                                                                                               | 374358  |
| #30 | 'major depression'/exp OR 'major depressive disorder':ab,ti OR (major NEXT/2 depress*):ab,ti                                                                                                                                                | 55229   |
| #31 | #18 AND #30                                                                                                                                                                                                                                 | 12883   |
| #32 | #21 AND #30                                                                                                                                                                                                                                 | 5686    |

| No. | Query                                                                                                                                                                                                                                                                                                                                                                                                                                                                                                    | Results |
|-----|----------------------------------------------------------------------------------------------------------------------------------------------------------------------------------------------------------------------------------------------------------------------------------------------------------------------------------------------------------------------------------------------------------------------------------------------------------------------------------------------------------|---------|
| #33 | #29 AND #30                                                                                                                                                                                                                                                                                                                                                                                                                                                                                              | 1555    |
| #34 | #31 OR #32 OR #33                                                                                                                                                                                                                                                                                                                                                                                                                                                                                        | 17290   |
| #35 | 'systematic review'/exp OR 'meta analysis'/exp OR 'systematic review':ab,ti OR (meta NEXT/1 analy*):ab,ti OR metaanaly*':ab,ti OR (review:it AND systematic:ab,ti) OR (systematic:ab,ti AND (bibliographic:ab,ti OR literature:ab,ti OR review:ab,ti OR reviewed:ab,ti OR reviews:ab,ti)) OR 'research synthesis':ab,ti OR 'research integration':ab,ti OR (comprehensive*':ab,ti AND (bibliographic:ab,ti OR literature:ab,ti)) OR (review:it AND review:ab,ti AND (rationale:ab,ti OR evidence:ab,ti)) | 312865  |
| #36 | 'randomized controlled trial'/exp OR (randomi?ed NEXT/1 'controlled trial'):ab,ti OR 'double blind procedure'/exp OR 'single blind procedure'/exp OR 'randomization'/exp OR 'random allocation':ab,ti OR (allocated NEXT/2 random*):ab,ti                                                                                                                                                                                                                                                                | 460334  |
| #37 | 'cohort analysis'/exp OR 'case control study'/exp OR 'observational study'/exp OR 'longitudinal study'/exp OR 'prospective study'/exp OR 'retrospective study'/exp OR (cohort NEXT/1 (stud* OR analy*)):ab,ti OR (observational OR 'case control') NEXT/1 stud* OR ((longitudinal OR retrospective OR prospective) NEXT/2 (trial OR study)):ab,ti AND ('comparative study'/exp OR comparative:ab,ti OR comparison:ab,ti)                                                                                 | 160923  |
| #38 | 'controlled clinical trial'/exp OR (controlled NEXT/2 (trial* OR stud*)):ab,ti                                                                                                                                                                                                                                                                                                                                                                                                                           | 618207  |
| #39 | #35 OR #36 OR #37 OR #38                                                                                                                                                                                                                                                                                                                                                                                                                                                                                 | 1077437 |
| #40 | #34 AND #39                                                                                                                                                                                                                                                                                                                                                                                                                                                                                              | 5782    |
| #41 | 'animal'/exp NOT 'human'/exp                                                                                                                                                                                                                                                                                                                                                                                                                                                                             | 4405184 |
| #42 | #40 NOT #41                                                                                                                                                                                                                                                                                                                                                                                                                                                                                              | 5779    |
| #43 | 'groups by age'/exp NOT 'adult'/exp                                                                                                                                                                                                                                                                                                                                                                                                                                                                      | 5494792 |
| #44 | #42 NOT #43                                                                                                                                                                                                                                                                                                                                                                                                                                                                                              | 2942    |
| #45 | #44 AND [2014-2015]/py                                                                                                                                                                                                                                                                                                                                                                                                                                                                                   | 205     |
| #46 | #45 AND [english]/lim                                                                                                                                                                                                                                                                                                                                                                                                                                                                                    | 204     |
| #47 | #45 AND (german:la OR italian:la)                                                                                                                                                                                                                                                                                                                                                                                                                                                                        | 0       |
| #48 | #46 OR #47                                                                                                                                                                                                                                                                                                                                                                                                                                                                                               | 204     |
| #49 | #48 AND [embase]/lim                                                                                                                                                                                                                                                                                                                                                                                                                                                                                     | 198     |

### CINAHL Plus (Ebsco) 13 January 2015

| #   | Query                                                                                                                                                                                                                    | Results |
|-----|--------------------------------------------------------------------------------------------------------------------------------------------------------------------------------------------------------------------------|---------|
| S1  | (MH "Bupropion") OR "Bupropion"                                                                                                                                                                                          | 1,448   |
| S2  | (MH "Citalopram") OR "Citalopram"                                                                                                                                                                                        | 1,094   |
| S3  | Escitalopram                                                                                                                                                                                                             | 397     |
| S4  | (MH "Desvenlafaxine Succinate" ) OR Desvenlafaxine                                                                                                                                                                       | 97      |
| S5  | (MH "Fluoxetine+") OR "Fluoxetine"                                                                                                                                                                                       | 1,534   |
| S6  | (MH "Fluvoxamine Maleate") OR "Fluvoxamine"                                                                                                                                                                              | 207     |
| S7  | "Levomilnacipran"                                                                                                                                                                                                        | 11      |
| S8  | (MH "Mirtazapine") OR "mirtazapine"                                                                                                                                                                                      | 363     |
| S9  | (MH "Nefazodone") OR "nefazodone"                                                                                                                                                                                        | 82      |
| S10 | (MH "Paroxetine") OR "Paroxetine"                                                                                                                                                                                        | 1,03    |
| S11 | (MH "Sertraline Hydrochloride") OR "Sertraline"                                                                                                                                                                          | 927     |
| S12 | (MH "Trazodone") OR "Trazodone"                                                                                                                                                                                          | 234     |
| S13 | (MH "Venlafaxine+") OR "venlafaxine"                                                                                                                                                                                     | 876     |
| S14 | "vilazodone"                                                                                                                                                                                                             | 25      |
| S15 | "vortioxetine"                                                                                                                                                                                                           | 17      |
| S16 | (MH "Duloxetine Hydrochloride") OR (TX Duloxetine)                                                                                                                                                                       | 1,305   |
| S17 | (MH "Antidepressive Agents, Second Generation+")                                                                                                                                                                         | 3,975   |
| S18 | S1 OR S2 OR S3 OR S4 OR S5 OR S6 OR S7 OR S8 OR S9 OR S10 OR S11 OR S12 OR S13 OR S14 OR S15 OR S16 OR S17                                                                                                               | 7,776   |
| S19 | (MH "Psychotherapy+") OR (TI psychotherap*) OR (AB psychotherap*)                                                                                                                                                        | 117,68  |
| S20 | TI (("Acceptance and Commitment" OR cognitive OR behavioral OR psychodynamic OR interpersonal) N2 therap*) OR AB (("Acceptance and Commitment" OR cognitive OR behavioral OR psychodynamic OR interpersonal) N2 therap*) | 6,208   |
| S21 | S19 OR S20                                                                                                                                                                                                               | 119,031 |
| S22 | (MH "Yoga+") OR (TI yoga) OR (AB yoga)                                                                                                                                                                                   | 4,665   |

| #   | Query                                                                                                                                                                                                                                                                                                                                                                    | Results |
|-----|--------------------------------------------------------------------------------------------------------------------------------------------------------------------------------------------------------------------------------------------------------------------------------------------------------------------------------------------------------------------------|---------|
| S23 | (MH "Meditation") OR (TI (meditation OR mindfulness)) OR (AB (meditation OR mindfulness))                                                                                                                                                                                                                                                                                | 4,231   |
| S24 | (MH "St. John's Wort") OR "hypericum" OR (TI john* N2 wort) OR (AB john* N2 wort) OR (TI (LI160 OR WS5572 OR WS5573 OR LoHyp-57)) OR (AB (LI160 OR WS5572 OR WS5573 OR LoHyp-57))                                                                                                                                                                                        | 1,145   |
| S25 | (MH "Fatty Acids, Omega-3+") OR (TI "omega 3" N1 fatty acid*) OR (AB "omega 3" N1 fatty acid*) OR (TI ("fish oil" OR "flax seed" OR "borage seed" OR Borago OR "evening primrose" OR Oenothera OR "eicosapentaenoic acid" OR PUFA)) OR (AB ("fish oil" OR "flax seed" OR "borage seed" OR Borago OR "evening primrose" OR Oenothera OR "eicosapentaenoic acid" OR PUFA)) | 7,684   |
| S26 | (MH "S-Adenosylmethionine") OR (TI ("s adenosyl l methionine" OR "s adenosylmethionine")) OR (AB ("s adenosyl l methionine" OR "s adenosylmethionine"))                                                                                                                                                                                                                  | 291     |
| S27 | (MH "Acupuncture+") OR (TI (acupuncture OR electroacupuncture)) OR (AB (acupuncture OR electroacupuncture))                                                                                                                                                                                                                                                              | 11,43   |
| S28 | (MH "Exercise+") OR TI (physical N1 (activit* OR exercise)) OR AB (physical N1 (activit* OR exercise))                                                                                                                                                                                                                                                                   | 85,935  |
| S29 | S22 OR S23 OR S24 OR S25 OR S26 OR S27 OR S28                                                                                                                                                                                                                                                                                                                            | 112,416 |
| S30 | (MH "Depression") AND (TX major N2 depress*)                                                                                                                                                                                                                                                                                                                             | 8,569   |
| S31 | TI ( major N2 depress* OR "major depressive disorder" ) OR AB ( major N2 depress* OR "major depressive disorder" )                                                                                                                                                                                                                                                       | 6,57    |
| S32 | S30 OR S31                                                                                                                                                                                                                                                                                                                                                               | 9,83    |
| S33 | S18 AND S32                                                                                                                                                                                                                                                                                                                                                              | 1,091   |
| S34 | S21 AND S32                                                                                                                                                                                                                                                                                                                                                              | 1,482   |
| S35 | S29 AND S32                                                                                                                                                                                                                                                                                                                                                              | 462     |
| S36 | S33 OR S34 OR S35                                                                                                                                                                                                                                                                                                                                                        | 2,742   |
| S37 | (MH "Animals") NOT (MH "Human")                                                                                                                                                                                                                                                                                                                                          | 51,653  |
| S38 | S36 NOT S37                                                                                                                                                                                                                                                                                                                                                              | 2,737   |
| S39 | ( (MH "Infant") OR (MH "Child") OR (MH "Adolescence") ) NOT (MH "Adult+")                                                                                                                                                                                                                                                                                                | 315,299 |
| S40 | S38 NOT S39                                                                                                                                                                                                                                                                                                                                                              | 2,525   |
| S41 | S40 AND (LA (english OR german OR italian))                                                                                                                                                                                                                                                                                                                              | 2,513   |
| S42 | S41 AND (PY 2014-2015)                                                                                                                                                                                                                                                                                                                                                   | 136     |
| S43 | S42 NOT (PT (editorial OR letter OR commentary OR "case study"))                                                                                                                                                                                                                                                                                                         | 131     |

### AMED (Ovid) 13 January 2015

| #  | Suchen                                                                                                                                                                      | Ergebnisse |
|----|-----------------------------------------------------------------------------------------------------------------------------------------------------------------------------|------------|
| 1  | exp antidepressive agents/                                                                                                                                                  | 281        |
| 2  | Bupropion.mp.                                                                                                                                                               | 15         |
| 3  | Citalopram.mp.                                                                                                                                                              | 9          |
| 4  | Escitalopram.mp.                                                                                                                                                            | 3          |
| 5  | (Desvenlafaxine or O-desmethylvenlafaxine).mp.                                                                                                                              | 0          |
| 6  | (Fluoxetine or Fluvoxamine).mp.                                                                                                                                             | 56         |
| 7  | Levomilnacipran.mp.                                                                                                                                                         | 0          |
| 8  | mirtazapine.mp.                                                                                                                                                             | 6          |
| 9  | (nefazodone or Paroxetine or Sertraline or Trazodone or venlafaxine or vilazodone or vortioxetine or duloxetine).mp.                                                        | 91         |
| 10 | 1 or 2 or 3 or 4 or 5 or 6 or 7 or 8 or 9                                                                                                                                   | 393        |
| 11 | exp psychotherapy/                                                                                                                                                          | 8680       |
| 12 | ((acceptance or cognitive or interpersonal or psychodynamic or behavioral) adj3 (therap\$ or psychotherap\$)).mp.                                                           | 1443       |
| 13 | 11 or 12                                                                                                                                                                    | 9045       |
| 14 | exp fatty acids/ or exp fish oils/ or (omega 3 and acid*).mp. or (flax seed or borage seed or Borago or evening primrose or Oenothera or eicosapentaenoic acid or PUFA).mp. | 666        |
| 15 | exp hypericum/ or (hypericum or (john\$ adj1 wort)).mp. or (LI160 or WS5572 or WS5573 or LoHyp-57).mp.                                                                      | 420        |
| 16 | (S-Adenosylmethionine or s adenosyl l methionine).mp.                                                                                                                       | 21         |
| 17 | exp acupuncture/ or exp electroacupuncture/ or (acupuncture or                                                                                                              | 9406       |

| #  | Suchen                                                        | Ergebnisse |
|----|---------------------------------------------------------------|------------|
|    | electroacupuncture).mp.                                       |            |
| 18 | exp meditation/ or (meditation or mindfulness).mp.            | 678        |
| 19 | exp Yoga/ or yoga.mp.                                         | 521        |
| 20 | (physical adj1 (activit* or exercise)).mp. or exp Exercise/   | 10153      |
| 21 | 14 or 15 or 16 or 17 or 18 or 19 or 20                        | 21568      |
| 22 | exp depressive disorder/                                      | 997        |
| 23 | ((major adj2 depress\$) or major depressive disorder).mp.     | 360        |
| 24 | 22 or 23                                                      | 1235       |
| 25 | 10 or 13 or 21                                                | 30590      |
| 26 | 24 and 25                                                     | 306        |
| 27 | exp animals/ not exp humans/                                  | 7987       |
| 28 | 26 not 27                                                     | 287        |
| 29 | (exp infant/ or exp child/ or exp adolescent/) not exp adult/ | 15990      |
| 30 | 28 not 29                                                     | 272        |
| 31 | limit 30 to yr="2014 -Current"                                | 10         |

### PsycINFO (Ebsco) 13 January 2015

| #   | Query                                                                                                                                                                                                                                                                                                | Results |
|-----|------------------------------------------------------------------------------------------------------------------------------------------------------------------------------------------------------------------------------------------------------------------------------------------------------|---------|
| S1  | DE "Bupropion" OR TI Bupropion OR AB Bupropion                                                                                                                                                                                                                                                       | 1,739   |
| S2  | DE "Citalopram" OR TI Citalopram OR AB Citalopram                                                                                                                                                                                                                                                    | 2,213   |
| S3  | TX Escitalopram                                                                                                                                                                                                                                                                                      | 1       |
| S4  | TX Desvenlafaxine                                                                                                                                                                                                                                                                                    | 94      |
| S5  | DE "Fluoxetine" OR TI Fluoxetine OR AB Fluoxetine                                                                                                                                                                                                                                                    | 5,746   |
| S6  | DE "Fluvoxamine" OR TI Fluvoxamine OR AB Fluvoxamine                                                                                                                                                                                                                                                 | 1,479   |
| S7  | TX Levomilnacipran                                                                                                                                                                                                                                                                                   | 11      |
| S8  | TX mirtazapine                                                                                                                                                                                                                                                                                       | 995     |
| S9  | DE "Nefazodone" OR TI nefazodone OR AB nefazodone                                                                                                                                                                                                                                                    | 457     |
| S10 | DE "Paroxetine" OR TI Paroxetine OR AB Paroxetine                                                                                                                                                                                                                                                    | 2,924   |
| S11 | DE "Sertraline" OR TI Sertraline OR AB Sertraline                                                                                                                                                                                                                                                    | 2,316   |
| S12 | DE "Trazodone" OR TI Trazodone OR AB Trazodone                                                                                                                                                                                                                                                       | 784     |
| S13 | DE "Venlafaxine" OR TI venlafaxine OR AB venlafaxine                                                                                                                                                                                                                                                 | 1,957   |
| S14 | TX vilazodone                                                                                                                                                                                                                                                                                        | 23      |
| S15 | TX vortioxetine                                                                                                                                                                                                                                                                                      | 24      |
| S16 | TX duloxetine                                                                                                                                                                                                                                                                                        | 768     |
| S17 | DE "antidepressant drugs" AND TX (second generation)                                                                                                                                                                                                                                                 | 155     |
| S18 | S1 OR S2 OR S3 OR S4 OR S5 OR S6 OR S7 OR S8 OR S9 OR S10 OR S11 OR S12 OR S13 OR S14 OR S15 OR S16 OR S17                                                                                                                                                                                           | 16,934  |
| S19 | (DE "acceptance and commitment therapy") or ((DE "cognitive therapy") or (DE "behavior therapy")) OR (DE psychotherapy)                                                                                                                                                                              | 66,057  |
| S20 | TI ( (acceptance and commitment therap*) OR (cognitive N2 therap*) OR (behavior* therap) OR (interpersonal therap*) OR (psychodynamic therap*) ) OR AB ( (acceptance and commitment therap*) OR (cognitive N2 therap*) OR (behavior* therap) OR (interpersonal therap*) OR (psychodynamic therap*) ) | 25,883  |
| S21 | S19 OR S20                                                                                                                                                                                                                                                                                           | 81,679  |
| S22 | (DE acupuncture) OR TI ( (acupuncture OR electroacupuncture) ) OR AB ( (acupuncture OR electroacupuncture) )                                                                                                                                                                                         | 1,682   |
| S23 | (DE meditation) OR TI ( (meditation OR mindfulness) ) OR AB ( (meditation OR mindfulness) )                                                                                                                                                                                                          | 9,174   |
| S24 | (DE hypericum perforatum) OR TI ( (hypericum OR (john* N1 wort) OR LI160 OR WS5572 OR WS5573 LoHyp-57) ) OR AB ( (hypericum OR (john* N1 wort) OR LI160 OR WS5572 OR WS5573 LoHyp-57) )                                                                                                              | 399     |
| S25 | DE yoga) OR TI yoga OR AB yoga                                                                                                                                                                                                                                                                       | 1,72    |
| S26 | TX ((omega-3 N1 fatty acid*) OR "fish oil" OR "flax seed" OR "borage seed" OR Borago OR "evening primrose" OR Oenothera OR "eicosapentaenoic acid" OR PUFA)                                                                                                                                          | 1,06    |
| S27 | TX ("s adenosyl l methionine" OR "s adenosylmethionine")                                                                                                                                                                                                                                             | 218     |



| #   | Query                                                                                                                                                                                                                                                                                                                                                                                                                                                                                                        | Results   |
|-----|--------------------------------------------------------------------------------------------------------------------------------------------------------------------------------------------------------------------------------------------------------------------------------------------------------------------------------------------------------------------------------------------------------------------------------------------------------------------------------------------------------------|-----------|
| S28 | DE exercise OR TI (physical W1 (activit* OR exercis*)) OR AB (physical W1 (activit* OR exercis*))                                                                                                                                                                                                                                                                                                                                                                                                            | 31,426    |
| S29 | S22 OR S23 OR S24 OR S25 OR S26 OR S27 OR S28                                                                                                                                                                                                                                                                                                                                                                                                                                                                | 44,488    |
| S30 | DE ( "major depressive disorder" OR "Major Depression" ) OR TI ( "major depressive disorder" OR (Major N2 Depress*) ) OR AB ( "major depressive disorder" OR (Major N2 Depress*) )                                                                                                                                                                                                                                                                                                                           | 99,261    |
| S31 | S18 AND S30                                                                                                                                                                                                                                                                                                                                                                                                                                                                                                  | 7,216     |
| S32 | S21 AND S30                                                                                                                                                                                                                                                                                                                                                                                                                                                                                                  | 6,383     |
| S33 | S29 AND S30                                                                                                                                                                                                                                                                                                                                                                                                                                                                                                  | 2,047     |
| S34 | S31 OR S32 OR S33                                                                                                                                                                                                                                                                                                                                                                                                                                                                                            | 14,918    |
| S35 | TI ( controlled N2 (trial OR study) ) OR AB ( controlled N2 (trial OR study) )                                                                                                                                                                                                                                                                                                                                                                                                                               | 39,02     |
| S36 | TI ( randomi*ed controlled trial) OR AB ( randomi*ed controlled trial) OR TI ( random* N4 (trial OR study)) OR AB ( random* N4 (trial OR study))                                                                                                                                                                                                                                                                                                                                                             | 43,179    |
| S37 | TI ( "double-blind" OR (random* assigned) OR "single-blind" ) OR AB ( "double-blind" OR (random* assigned) OR "single-blind")                                                                                                                                                                                                                                                                                                                                                                                | 45,025    |
| S38 | TI ( systematic N3 (bibliographic OR literature OR review# OR reviewed) ) OR AB ( systematic N3 (bibliographic OR literature OR review# OR reviewed) ) OR ( comprehensive N3 (bibliographic OR literature) ) OR ( (TI "research integration") OR (AB "research integration") ) OR ( (TI "research synthesis") Or (AB "research synthesis") ) OR ( (TI metaanaly* OR meta-analy*) OR (AB metaanaly* OR meta-analy*) ) OR ( MR ("systematic review" OR "meta analysis") )                                      | 35,443    |
| S39 | ((MR "longitudinal study" OR "retrospective study" OR "prospective study") OR (DE "cohort analysis") OR TI ( (cohort N1 (analy* OR stud*)) OR ((observational OR "case control") N1 stud*) OR ((longitudinal OR retrospective OR prospective) N2 (trial OR study)) ) OR AB ( (cohort N1 (analy* OR stud*)) OR ((observational OR "case control") N1 stud*) OR ((longitudinal OR retrospective OR prospective) N2 (trial OR study)) )) AND (TI (comparative OR comparison) OR AB (comparative OR comparison)) | 11,52     |
| S40 | S35 OR S36 OR S37 OR S38 OR S39                                                                                                                                                                                                                                                                                                                                                                                                                                                                              | 127,772   |
| S41 | S34 AND S40                                                                                                                                                                                                                                                                                                                                                                                                                                                                                                  | 4,196     |
| S42 | ((ZZ "comment/reply") or (ZZ "editorial") or (ZZ "letter"))                                                                                                                                                                                                                                                                                                                                                                                                                                                  | 150,398   |
| S43 | S41 NOT S42                                                                                                                                                                                                                                                                                                                                                                                                                                                                                                  | 3,957     |
| S44 | ((ZP "animal")) not ((ZP "human"))                                                                                                                                                                                                                                                                                                                                                                                                                                                                           | 289,185   |
| S45 | S43 NOT S44                                                                                                                                                                                                                                                                                                                                                                                                                                                                                                  | 3,947     |
| S46 | ((((ZG "childhood (birth-12 yrs)" or (ZG "infancy (2-23 mo)")) or ((ZG "adolescence (13-17 yrs)")))) not ((ZG "adulthood (18 yrs & older)"))                                                                                                                                                                                                                                                                                                                                                                 | 411,03    |
| S47 | S45 NOT S46                                                                                                                                                                                                                                                                                                                                                                                                                                                                                                  | 3,746     |
| S48 | LA (english OR german OR italian)                                                                                                                                                                                                                                                                                                                                                                                                                                                                            | 3,603,958 |
| S49 | S47 AND S48                                                                                                                                                                                                                                                                                                                                                                                                                                                                                                  | 3,619     |
| S50 | PY 2014-2015                                                                                                                                                                                                                                                                                                                                                                                                                                                                                                 | 155,082   |
| S51 | S49 AND S50                                                                                                                                                                                                                                                                                                                                                                                                                                                                                                  | 257       |

## Grey Literature Search

### ClinicalTrials.gov 04.06.2014

#### 41 studies found for:

("major depressive disorder" OR "major depression") AND Bupropion Adult, Senior Phase 2, 3, 4

#### 170 studies found for:

("major depressive disorder" OR "major depression") AND Citalopram Adult, Senior Phase 2, 3, 4

#### 170 studies found for:

("major depressive disorder" OR "major depression") AND Escitalopram Adult, Senior Phase 2, 3, 4

#### 35 studies found for:

("major depressive disorder" OR "major depression") AND Desvenlafaxine Adult, Senior Phase 2, 3, 4

#### 45 studies found for:

("major depressive disorder" OR "major depression") AND Fluoxetine Adult, Senior Phase 2, 3, 4

**6 studies found for:**

("major depressive disorder" OR "major depression") AND Fluvoxamine Adult, Senior Phase 2, 3, 4

**7 studies found for:**

("major depressive disorder" OR "major depression") AND Levomilnacipran Adult, Senior Phase 2, 3, 4

**21 studies found for:**

("major depressive disorder" OR "major depression") AND mirtazapine Adult, Senior Phase 2, 3, 4

Found no studies with search of: ("major depressive disorder" OR "major depression") AND nefazodone Adult, Senior Phase 2, 3, 4

**61 studies found for:**

("major depressive disorder" OR "major depression") AND Paroxetine Adult, Senior Phase 2, 3, 4

**66 studies found for:**

("major depressive disorder" OR "major depression") AND Sertraline Adult, Senior Phase 2, 3, 4

**4 studies found for:**

("major depressive disorder" OR "major depression") AND Trazodone Adult, Senior Phase 2, 3, 4

**66 studies found for:**

("major depressive disorder" OR "major depression") AND venlafaxine Adult, Senior Phase 2, 3, 4

**13 studies found for:**

("major depressive disorder" OR "major depression") AND vilazodone Adult, Senior Phase 2, 3, 4

**24 studies found for:**

("major depressive disorder" OR "major depression") AND vortioxetine Adult, Senior Phase 2, 3, 4

**74 studies found for:**

("major depressive disorder" OR "major depression") AND duloxetine Adult, Senior Phase 2, 3, 4

**ICTRP 04.06.2014**

342 records for 243 trials found for: major depress\* AND antidepress\*

**Drugs@FDA 02.06.2014**

Levomilnacipran:

[http://www.accessdata.fda.gov/scripts/cder/drugsatfda/index.cfm?fuseaction=Search.Set\\_Current\\_Drug&Applicant=FOREST%20LABS%20INC&ProductMktStatus=1&goto=Search.DrugDetails](http://www.accessdata.fda.gov/scripts/cder/drugsatfda/index.cfm?fuseaction=Search.Set_Current_Drug&Applicant=FOREST%20LABS%20INC&ProductMktStatus=1&goto=Search.DrugDetails)

Vilazodone:

[http://www.accessdata.fda.gov/scripts/cder/drugsatfda/index.cfm?fuseaction=Search.Set\\_Current\\_Drug&Applicant=FOREST%20LABS%20INC&ProductMktStatus=1&goto=Search.DrugDetails](http://www.accessdata.fda.gov/scripts/cder/drugsatfda/index.cfm?fuseaction=Search.Set_Current_Drug&Applicant=FOREST%20LABS%20INC&ProductMktStatus=1&goto=Search.DrugDetails)

Vortioxetine:

[http://www.accessdata.fda.gov/scripts/cder/drugsatfda/index.cfm?fuseaction=Search.Set\\_Current\\_Drug&Applicant=TAKEDA%20PHARMS%20USA&ProductMktStatus=1&goto=Search.DrugDetails](http://www.accessdata.fda.gov/scripts/cder/drugsatfda/index.cfm?fuseaction=Search.Set_Current_Drug&Applicant=TAKEDA%20PHARMS%20USA&ProductMktStatus=1&goto=Search.DrugDetails)

**European Medicines Agency 02.06.2014**

Levomilnacipran: 0

Vilazodone: 0

Vortioxetine:

[http://www.ema.europa.eu:80/ema/index.jsp?curl=pages/medicines/human/medicines/002717/human\\_med\\_001714.jsp&mid=WC0b01ac058001d124](http://www.ema.europa.eu:80/ema/index.jsp?curl=pages/medicines/human/medicines/002717/human_med_001714.jsp&mid=WC0b01ac058001d124)

**National Institute of Mental Health website 11.06.2014**

Search Terms: "major depression", "major depressive disorder"

## American Psychological Association 11.06.2014

Search terms, "major depressive disorder", major depression"

## Scopus 16.06.2014

(TITLE-ABS-KEY({major depressive disorder} OR {major depression}) OR KEY({disorder, major depressive})) AND (TITLE-ABS-KEY((bupropion OR citalopram OR escitalopram OR desvenlafaxine OR fluoxetine OR fluvoxamine OR levomilnacipran OR mirtazapine OR nefazodone OR paroxetine OR sertraline OR trazodone OR venlafaxine OR vilazodone OR vortioxetine OR duloxetine) OR ("Acceptance and Commitment Therapy" OR "Cognitive Therapy" OR "Cognitive behavioral Therapy" OR "interpersonal therapy" OR "psychodynamic therapy" OR "behavioral therapy") OR (hypericum OR "St. Johns Wort" OR "Saint Johns Wort" OR "St. John's Wort" OR "Saint John's Wort") OR ("s adenosyl l methionine" OR "S-Adenosylmethionine") OR ("omega 3") OR (acupuncture OR electroacupuncture) OR (yoga OR meditation OR mindfulness) OR ("physical activity" OR "physical exercise")) OR KEY(psychotherapy)) AND (TITLE-ABS-KEY(adult\*)) AND (DOCTYPE(cp))

162 document results

## Web of Science Conference Proceedings Citation Index- Science 16.06 2014

| Set  | Results | Search                                                                                                                                                                                                                                                                                   |
|------|---------|------------------------------------------------------------------------------------------------------------------------------------------------------------------------------------------------------------------------------------------------------------------------------------------|
| # 1  | 3,944   | Indexes=CPCI-S Timespan=All years<br>TOPIC: ("major depressive disorder" OR "major depression")                                                                                                                                                                                          |
| # 2  | 4,014   | Indexes=CPCI-S Timespan=All years<br>TOPIC: (bupropion OR citalopram OR escitalopram OR desvenlafaxine OR fluoxetine OR fluvoxamine OR levomilnacipran OR mirtazapine OR nefazodone OR paroxetine OR sertraline OR trazodone OR venlafaxine OR vilazodone OR vortioxetine OR duloxetine) |
| # 3  | 628     | Indexes=CPCI-S Timespan=1990-2014<br>TOPIC: ("Acceptance and Commitment Therapy" OR "Cognitive Therapy" OR "Cognitive behavioral Therapy" OR "interpersonal therapy" OR "psychodynamic therapy" OR "behavioral therapy")                                                                 |
| # 4  | 404     | Indexes=CPCI-S Timespan=1990-2014<br>TOPIC: (hypericum OR "St. Johns Wort" OR "Saint Johns Wort" OR "St. John's Wort" OR "Saint John's Wort")                                                                                                                                            |
| # 5  | 456     | Indexes=CPCI-S Timespan=1990-2014<br>TOPIC: ("s adenosyl l methionine" OR "S-Adenosylmethionine")                                                                                                                                                                                        |
| # 6  | 1,749   | Indexes=CPCI-S Timespan=1990-2014<br>TOPIC: ("omega 3")                                                                                                                                                                                                                                  |
| # 7  | 1,068   | Indexes=CPCI-S Timespan=1990-2014<br>TOPIC: (acupuncture OR electroacupuncture)                                                                                                                                                                                                          |
| # 8  | 517     | Indexes=CPCI-S Timespan=1990-2014<br>TOPIC: (yoga OR meditation OR mindfulness)                                                                                                                                                                                                          |
| # 9  | 6,836   | Indexes=CPCI-S Timespan=1990-2014<br>TOPIC: ("physical activity" OR "physical exercise")                                                                                                                                                                                                 |
| # 10 | 15,492  | Indexes=CPCI-S Timespan=1990-2014<br>#9 OR #8 OR #7 OR #6 OR #5 OR #4 OR #3 OR #2                                                                                                                                                                                                        |
| # 11 | 874     | Indexes=CPCI-S Timespan=1990-2014<br>#10 AND #1                                                                                                                                                                                                                                          |

---

---

|      |    |                                   |
|------|----|-----------------------------------|
|      |    | Indexes=CPCI-S Timespan=1990-2014 |
|      |    | Refined by: TOPIC: (adult*)       |
| # 12 | 55 | #10 AND #1                        |

---

## APPENDIX B: RISK OF BIAS ASSESSMENTS

| Author, Year<br>Trial Name        | Randomi-<br>zation<br>method<br>adequate? | Allocation<br>concealment<br>adequate? | Groups<br>similar at<br>baseline? | Outcome<br>asse-<br>ssors<br>masked? | Care<br>providers<br>masked? | Patients<br>masked? | High<br>overall<br>(i.e., ≥20%)<br>attrition? | High<br>differential<br>(i.e., ≥15%)<br>attrition? | Use<br>Intention-<br>to-treat<br>analyses? | Appropriate<br>method of<br>handling<br>dropouts in<br>analyses<br>used? | Could<br>selective<br>reporting of<br>outcomes<br>be an<br>issue? | Risk of Bias        |
|-----------------------------------|-------------------------------------------|----------------------------------------|-----------------------------------|--------------------------------------|------------------------------|---------------------|-----------------------------------------------|----------------------------------------------------|--------------------------------------------|--------------------------------------------------------------------------|-------------------------------------------------------------------|---------------------|
| David et al.,<br>2008             | NR                                        | NR                                     | Yes                               | Yes                                  | No                           | No                  | No                                            | No                                                 | Yes                                        | Yes                                                                      | No                                                                | Medium              |
| Sava et al.,<br>2009              |                                           |                                        |                                   |                                      |                              |                     |                                               |                                                    |                                            |                                                                          |                                                                   |                     |
| DeRubeis et al.,<br>2005          | Yes                                       | Yes                                    | Yes                               | Yes                                  | No                           | No                  | No                                            | No                                                 | Yes                                        | Yes                                                                      | No                                                                | Medium <sup>a</sup> |
| Leykin et al.,<br>2007            |                                           |                                        |                                   |                                      |                              |                     |                                               |                                                    |                                            |                                                                          |                                                                   |                     |
| Dimidjian et al.,<br>2006         | Yes                                       | NR                                     | Yes                               | Yes                                  | No                           | No                  | Yes                                           | Yes                                                | Yes                                        | Yes                                                                      | No                                                                | Medium              |
| Hegerl et al.,<br>2010            | Yes                                       | Yes                                    | Yes                               | Yes                                  | No                           | Yes                 | No                                            | No                                                 | Yes                                        | Yes                                                                      | Yes                                                               | Medium <sup>a</sup> |
| Kennedy et al.,<br>2007           | NR                                        | NR                                     | No                                | NR                                   | No                           | No                  | Yes                                           | No                                                 | No                                         | NR                                                                       | No                                                                | High                |
| Lam et al., 2013                  | Yes                                       | Yes                                    | Yes                               | Yes                                  | Yes                          | No                  | No                                            | No                                                 | Yes                                        | Yes                                                                      | No                                                                | Low                 |
| McGrath et al.,<br>2013           | Yes                                       | Yes                                    | No                                | Yes                                  | No                           | No                  | Yes                                           | No                                                 | No                                         | NR                                                                       | No                                                                | High                |
| Mynors-Wallis<br>et al., 2000     | Unclear                                   | Unclear                                | Yes                               | Yes                                  | No                           | No                  | Yes                                           | Yes                                                | Unclear                                    | Unclear                                                                  | Yes                                                               | Medium              |
| Segal et al.,<br>2006             | NR                                        | NR                                     | Yes                               | NR                                   | No                           | No                  | Yes                                           | Yes                                                | No                                         | NR                                                                       | No                                                                | High                |
| Shamsaei et al.,<br>2008          | Yes                                       | NR                                     | Yes                               | No                                   | No                           | No                  | NR                                            | NR                                                 | NR                                         | NR                                                                       | No                                                                | High                |
| WECare<br>Miranda et al.,<br>2003 | Yes                                       | Yes                                    | Yes                               | Yes                                  | No                           | No                  | Unclear                                       | No                                                 | Yes                                        | Yes                                                                      | No                                                                | Medium              |

<sup>a</sup> Study rated high risk of bias for change in HAM-D outcome.
